# Supplementary material for: Microwave-assisted green construction of imidazole-fused hybrid scaffolds using 2-aminobenzimidazoles as building blocks
Source: Royal Society of Chemistry journal article supplement (doi:10.1039/d1ra04396j), 2021-01-01

# **Microwave-Assisted Green Construction of Imidazole-Fused Hybrid Scaffolds Using 2-Aminobenzimidazoles as Building Blocks**

Jung Pyo Kwak,<sup>a</sup> Pham Duy Quang Dao,<sup>a</sup> Nam Sik Yoon<sup>b</sup> and Chan Sik Cho<sup>\*a</sup>

<sup>a</sup>Department of Applied Chemistry, Kyungpook National University, 80 Daehakro, Bukgu, Daegu 41566, Republic of Korea

<sup>b</sup>Department of Textile System Engineering, Kyungpook National University, 80 Daehakro, Bukgu, Daegu 41566, Republic of Korea

E-mail: cscho@knu.ac.kr

## Table of Contents

|                                                                                               |    |
|-----------------------------------------------------------------------------------------------|----|
| 1. Synthesis and characterization of 2-(2-bromoaryl)- and 2-(2-bromovinyl)imidazoles <b>1</b> | S3 |
| 2. Copies of $^1\text{H}$ and $^{13}\text{C}$ NMR Spectra of <b>1</b> and <b>3</b>            | S5 |

## 1. Synthesis and characterization of 2-(2-bromoaryl)- and 2-(2-bromovinyl)imidazoles 1.

To a 25 mL round-bottom flask was added 2-bromobenzaldehyde or  $\beta$ -bromo- $\alpha,\beta$ -unsaturated aldehyde (5 mmol), 1,2-diarylethane-1,2-dione (5 mmol), ammonium acetate (20 mmol), acetic acid (1.3 mL), and ethanol (12.5 mL). After the reaction mixture was stirred for 4 h under reflux condition and cooled down to room temperature, solvents were removed under reduced pressure. The residual solid was purified by column chromatography (dichloromethane/MeOH = 99/1) to give **1**. All new starting compounds were characterized spectroscopically as shown below.<sup>1</sup>

**2-(2-Bromophenyl)-4,5-di-*o*-tolyl-1*H*-imidazole (1e):** Yield 58% (1.17 g), white solid. mp 193-195 °C. <sup>1</sup>H NMR (500 MHz, DMSO-*d*<sub>6</sub>)  $\delta$  12.51 (s, 1H), 7.77 (dd, *J* = 8.0 and 0.9 Hz, 1H), 7.75 (dd, *J* = 7.7 and 1.6 Hz, 1H), 7.52-7.49 (m, 1H), 7.38-7.35 (m, 1H), 7.25-7.22 (m, 2H), 7.19-7.11 (m, 4H), 7.05-7.01 (m, 2H), 2.24 (s, 3H), 2.12 (s, 3H); <sup>13</sup>C NMR (125 MHz, DMSO-*d*<sub>6</sub>)  $\delta$  143.8, 138.3, 136.5, 136.3, 134.8, 133.5, 132.3, 131.6, 130.8, 130.6, 130.3, 130.2 (130.21), 130.2 (130.18), 130.0, 128.0 (128.02), 128.0 (128.00), 127.7, 126.8, 125.7, 125.2, 121.3, 20.2, 19.8. HRMS (EI): *m/z* [*M*<sup>+</sup>] calcd for C<sub>23</sub>H<sub>19</sub>BrN<sub>2</sub>: 402.0732, Found 402.0732.

**2-(2-Bromophenyl)-4,5-di(furan-2-yl)-1*H*-imidazole (1j):** Yield 40% (0.71 g), brown solid. mp 102-104 °C. <sup>1</sup>H NMR (500 MHz, DMSO-*d*<sub>6</sub>)  $\delta$  12.87 (s, 1H), 7.78 (dd, *J* = 6.5 and 0.6 Hz, 1H), 7.72 (s, 1H), 7.66 (dd, *J* = 7.6 and 1.6 Hz, 1H), 7.53-7.49 (m, 1H), 7.44-7.40 (m, 1H), 6.94 (d, *J* = 2.7 Hz, 1H), 6.73 (d, *J* = 2.5 Hz, 1H), 6.65 (s, 1H), 6.58 (s, 1H); <sup>13</sup>C NMR (125 MHz, DMSO-*d*<sub>6</sub>)  $\delta$  149.3, 145.4, 144.4, 142.6, 141.8, 133.1, 132.0, 131.9, 130.9, 128.9, 127.6, 122.0, 119.0, 111.8, 111.4, 108.1, 106.8. HRMS (EI): *m/z* [*M*<sup>+</sup>] calcd for C<sub>17</sub>H<sub>11</sub>BrN<sub>2</sub>O<sub>2</sub>: 354.0004, Found 354.0004.

**2-(1-Bromonaphthalen-2-yl)-4,5-diphenyl-1*H*-imidazole (1k):** Yield 51% (1.08 g), yellow solid. mp 179-181 °C. <sup>1</sup>H NMR (500 MHz, DMSO-*d*<sub>6</sub>)  $\delta$  12.78 (s, 1H), 8.37 (d, *J* = 8.5 Hz, 1H), 8.10-8.07 (m, 2H), 7.84 (d, *J* = 5.7 Hz, 1H), 7.79-7.75 (m, 1H), 7.71-7.67 (m, 1H), 7.60-7.53 (m, 4H), 7.46-7.43 (m, 2H), 7.38-7.31 (m, 3H), 7.25 (d, *J* = 6.7 Hz, 1H); <sup>13</sup>C NMR (125 MHz, DMSO-*d*<sub>6</sub>)  $\delta$  145.3, 136.9, 135.2, 133.8, 131.8, 130.9, 130.7, 128.7, 128.5 (128.49), 128.5 (128.47), 128.4, 128.2 (128.23), 128.2 (128.17), 128.0, 127.9, 127.7, 127.5, 127.3, 127.2, 126.6, 121.9. HRMS (EI): *m/z* [*M*<sup>+</sup>] calcd for C<sub>25</sub>H<sub>17</sub>BrN<sub>2</sub>: 424.0575, Found 424.0573.

**2-(2-Bromocyclohex-1-en-1-yl)-4,5-diphenyl-1*H*-imidazole (1l):** Yield 61% (1.16 g), white solid. mp 227-229 °C. <sup>1</sup>H NMR (500 MHz, DMSO-*d*<sub>6</sub>)  $\delta$  12.23 (s, 1H), 7.49-7.18 (m, 10H), 2.65-2.63 (m, 2H), 2.57-2.54 (m, 2H), 1.76-1.74 (m, 4H); <sup>13</sup>C NMR (125 MHz, DMSO-*d*<sub>6</sub>)  $\delta$  145.7, 136.0, 135.3, 131.0, 128.9, 128.6, 128.1, 128.0, 127.5, 127.1, 126.7, 126.4, 122.5, 36.9, 31.3, 24.0, 21.6. HRMS (EI): *m/z* [*M*<sup>+</sup>] calcd for C<sub>21</sub>H<sub>19</sub>BrN<sub>2</sub>: 378.0732, Found 378.0730.

**(*Z*)-2-(1-Bromo-1-phenylprop-1-en-2-yl)-4,5-diphenyl-1*H*-imidazole (1m):** Yield 67% (1.39 g), white

solid. mp 214-217 °C. <sup>1</sup>H NMR (500 MHz, DMSO-*d*<sub>6</sub>) δ 11.73 (s, 1H), 7.50-7.15 (m, 15H), 2.44 (s, 3H); <sup>13</sup>C NMR (125 MHz, DMSO-*d*<sub>6</sub>) δ 144.4, 140.4, 136.1, 134.9, 130.9, 129.4, 128.8, 128.6, 128.2, 128.0 (128.04), 128.0 (128.00), 127.8, 127.6, 127.0, 126.8, 126.4, 124.9, 24.0. HRMS (EI): *m/z* [M<sup>+</sup>] calcd for C<sub>24</sub>H<sub>19</sub>BrN<sub>2</sub>: 414.0732, Found 414.0729.

**(Z)-2-(1-Bromo-3-methyl-1-phenylbut-1-en-2-yl)-4,5-diphenyl-1H-imidazole (1n):** Yield 23% (0.51 g), white solid. mp 164-167 °C. <sup>1</sup>H NMR (500 MHz, DMSO-*d*<sub>6</sub>) δ 11.81 (s, 1H), 7.43-7.41 (m, 2H), 7.33-7.16 (m, 11H), 7.10-7.08 (m, 2H), 3.41 (sept, 1H), 1.18 (d, *J* = 6.9 Hz, 6H); <sup>13</sup>C NMR (125 MHz, DMSO-*d*<sub>6</sub>) δ 141.7, 140.1, 139.1, 135.9, 135.2, 131.0, 129.0, 128.5, 128.1, 127.9, 127.8, 127.6, 127.4, 126.9, 126.5, 126.3, 124.4, 35.4, 20.3. HRMS (EI): *m/z* [M<sup>+</sup>] calcd for C<sub>26</sub>H<sub>23</sub>BrN<sub>2</sub>: 442.1045, Found 442.1043.

**(Z)-2-(1-Bromo-3-methyl-1-phenylhex-1-en-2-yl)-4,5-diphenyl-1H-imidazole (1o):** Yield 18% (0.41 g), pale yellow solid. mp 140-143 °C. <sup>1</sup>H NMR (500 MHz, DMSO-*d*<sub>6</sub>) δ 11.74 (s, 1H), 7.44-7.41 (m, 1H), 7.37-7.33 (m, 2H), 7.32-7.25 (m, 6H), 7.24-7.21 (m, 3H), 7.18-7.14 (m, 1H), 7.12-7.10 (m, 2H), 2.88-2.85 (m, 2H), 1.55-1.49 (m, 2H), 1.44-1.37 (m, 2H), 0.92 (t, *J* = 7.3 Hz, 3H); <sup>13</sup>C NMR (125 MHz, DMSO-*d*<sub>6</sub>) δ 143.8, 140.4, 136.1, 135.0, 133.7, 130.9, 129.4, 128.6, 128.5, 128.0, 127.9, 127.7, 127.6, 126.9, 126.8, 126.3, 124.6, 36.9, 29.3, 21.8, 13.8. HRMS (EI): *m/z* [M<sup>+</sup>] calcd for C<sub>27</sub>H<sub>25</sub>BrN<sub>2</sub>: 456.1201, Found 456.1197.

**(Z)-2-(2-Bromo-1,2-diphenylvinyl)-4,5-diphenyl-1H-imidazole (1p):** Yield 16% (0.38 g), white solid. mp 220-222 °C. <sup>1</sup>H NMR (500 MHz, DMSO-*d*<sub>6</sub>) δ 12.71 (s, 1H), 7.51-7.47 (m, 4H), 7.43-7.40 (m, 2H), 7.36-7.25 (m, 8H), 7.22-7.15 (m, 4H), 7.07-7.06 (m, 2H); <sup>13</sup>C NMR (125 MHz, DMSO-*d*<sub>6</sub>) δ 146.6, 139.9, 138.5, 136.4, 135.1, 134.7, 130.9, 129.6 (129.63), 129.6 (129.55), 128.6 (128.63), 128.6 (128.55), 128.3, 128.1, 128.0 (128.03), 128.0 (127.98), 127.6, 127.5, 127.1, 126.9, 126.5, 125.6. HRMS (EI): *m/z* [M<sup>+</sup>] calcd for C<sub>29</sub>H<sub>21</sub>BrN<sub>2</sub>: 476.0888, Found 476.0885.

## References

1. M.-Y. Gang, J.-Q. Liu and X.-S. Wang, *Tetrahedron*, 2017, **73**, 469

## 2. Copies of $^1\text{H}$ and $^{13}\text{C}$ NMR Spectra

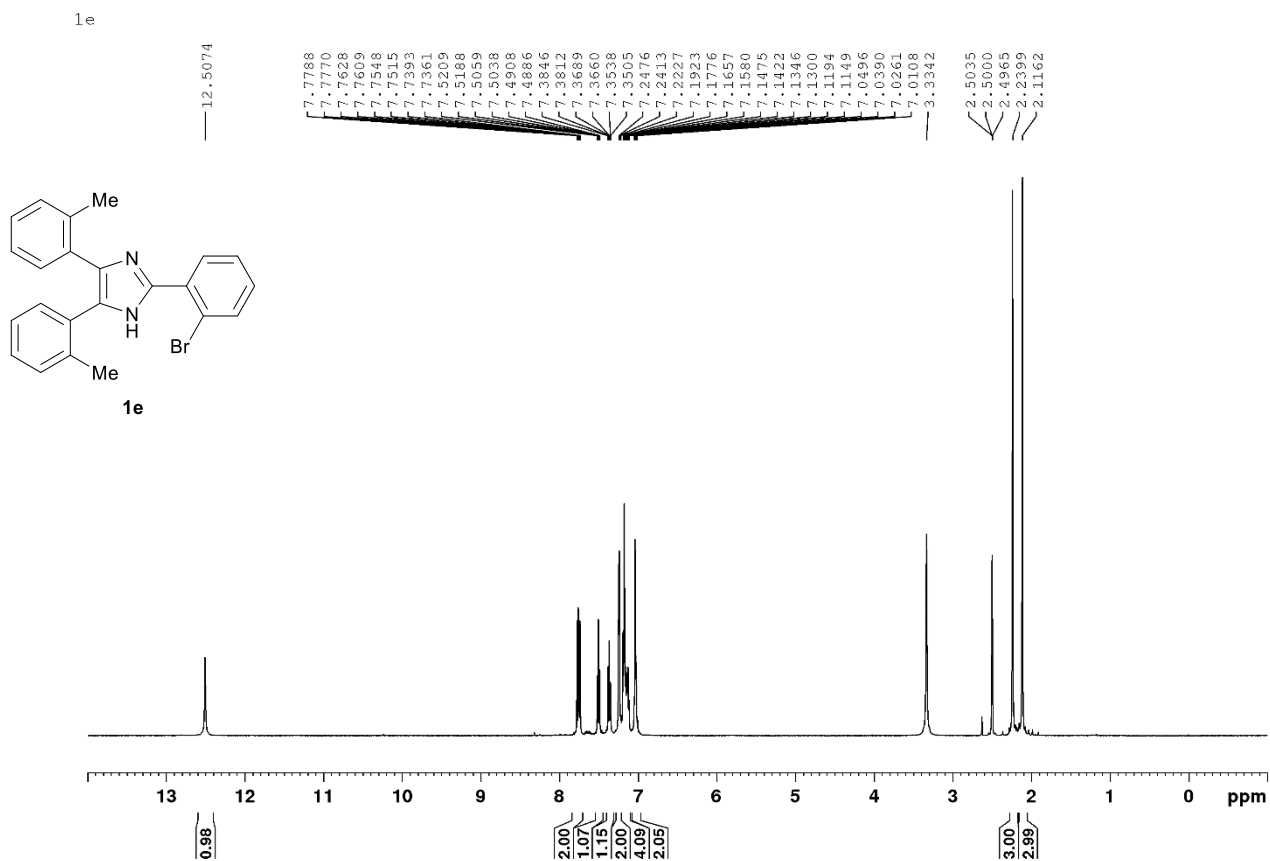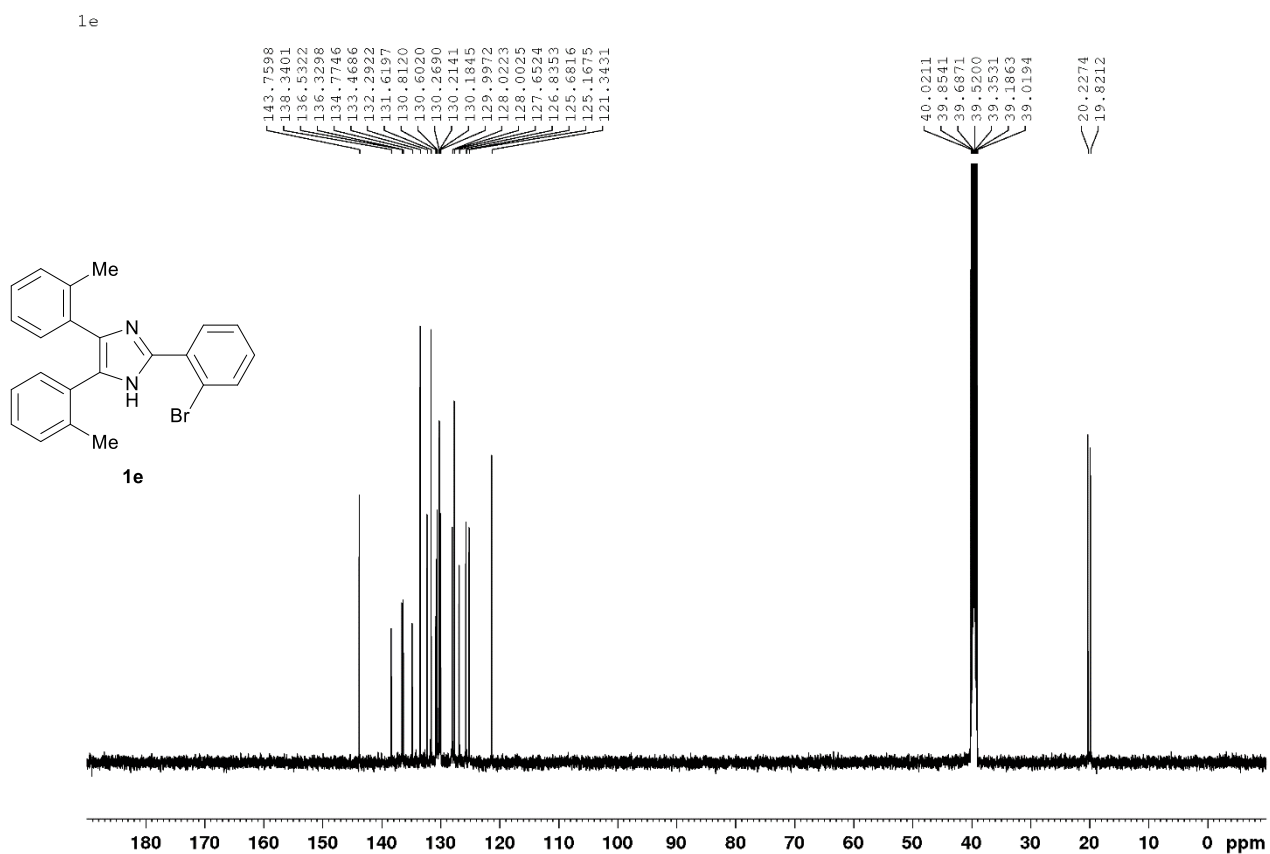

1j

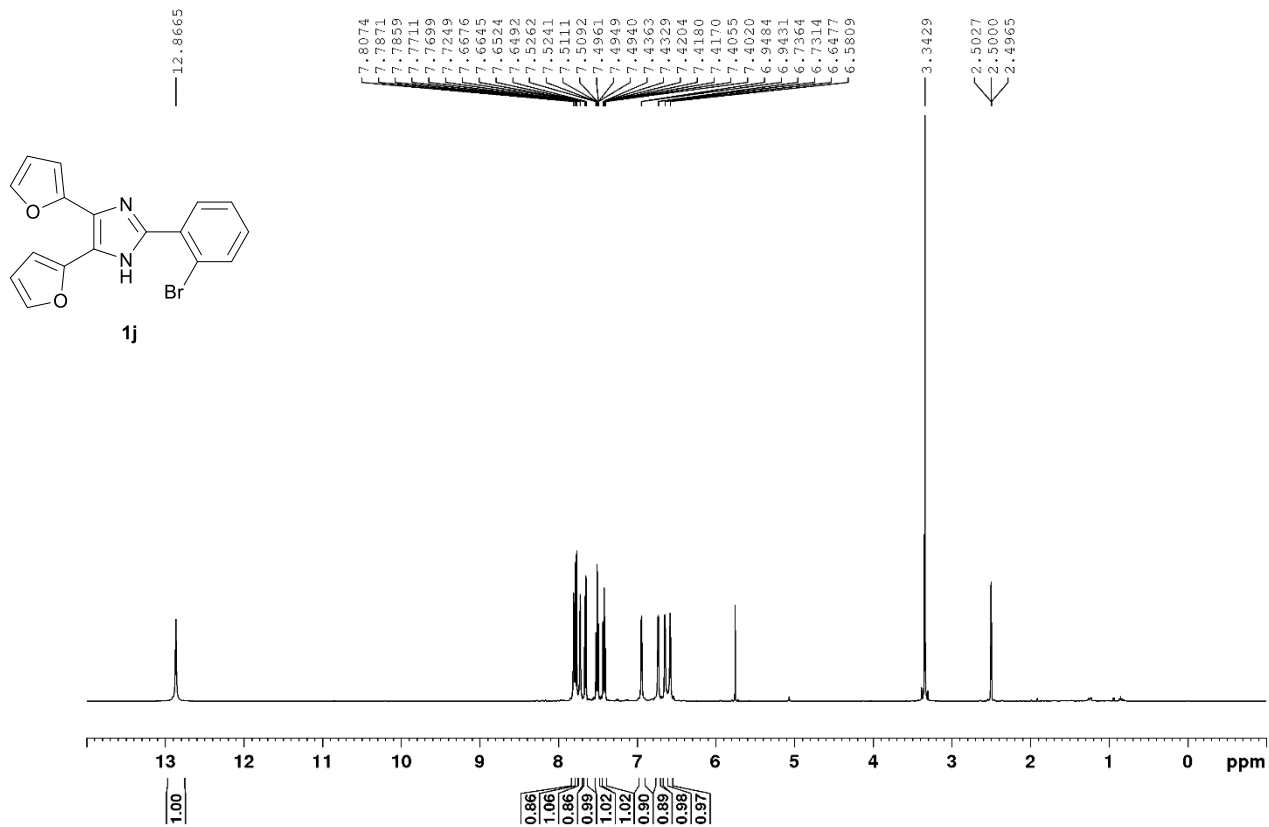

1j

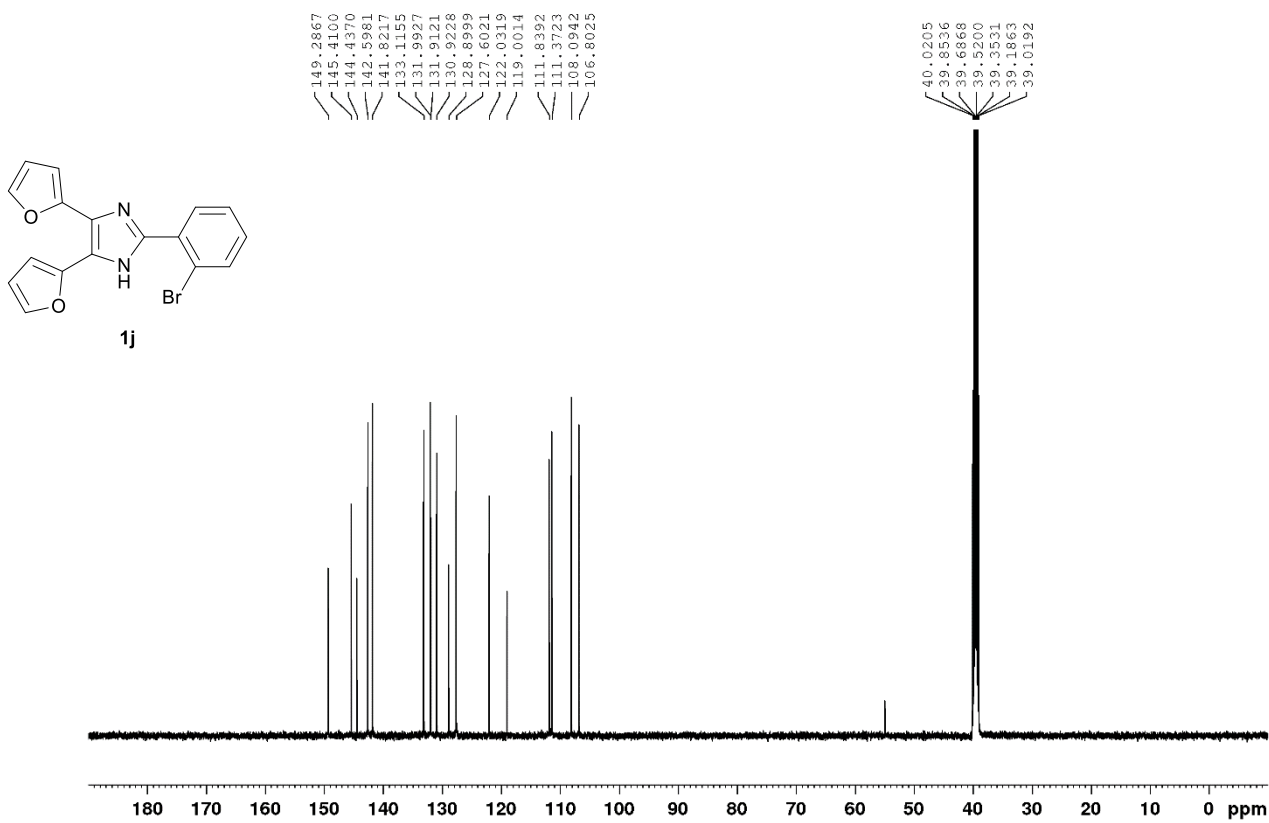

1k

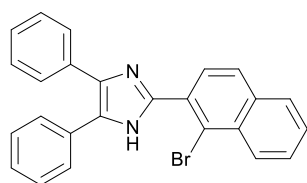

1k

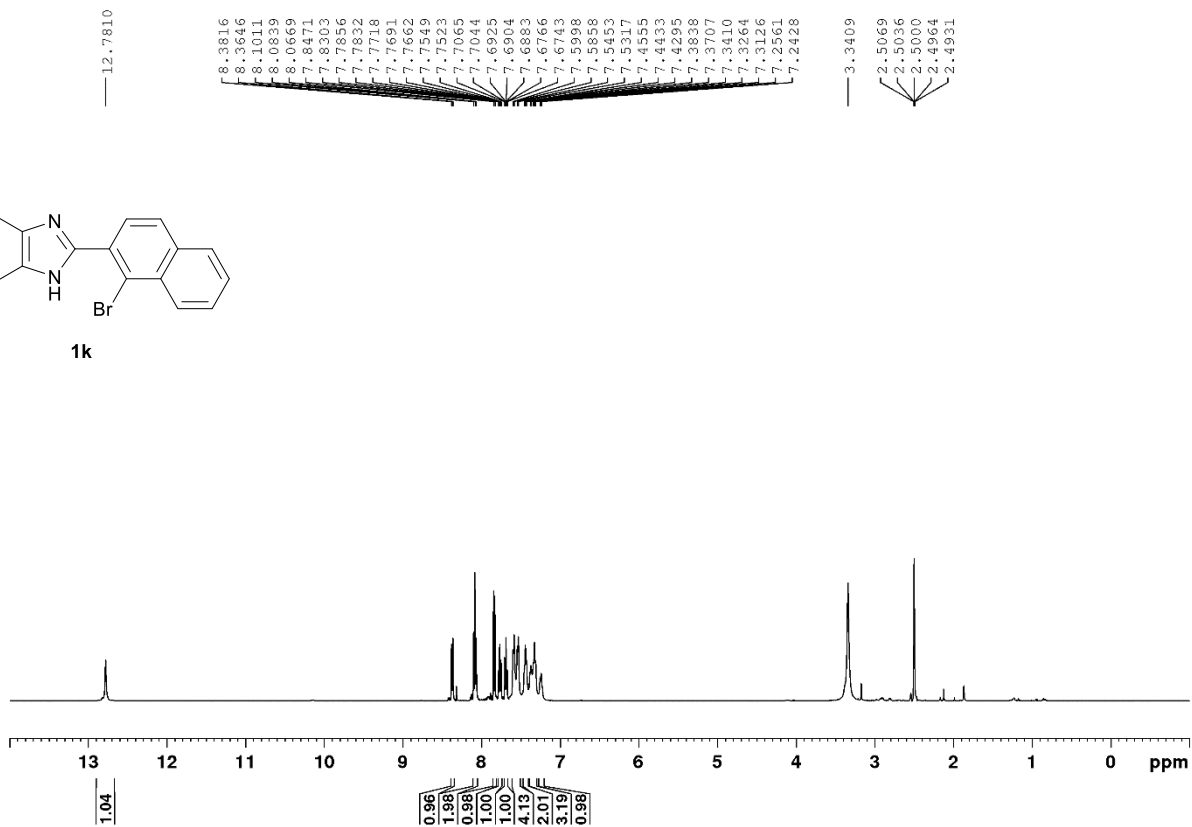

1k

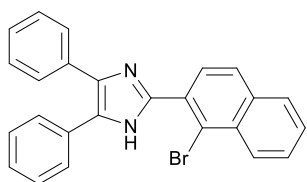

1k

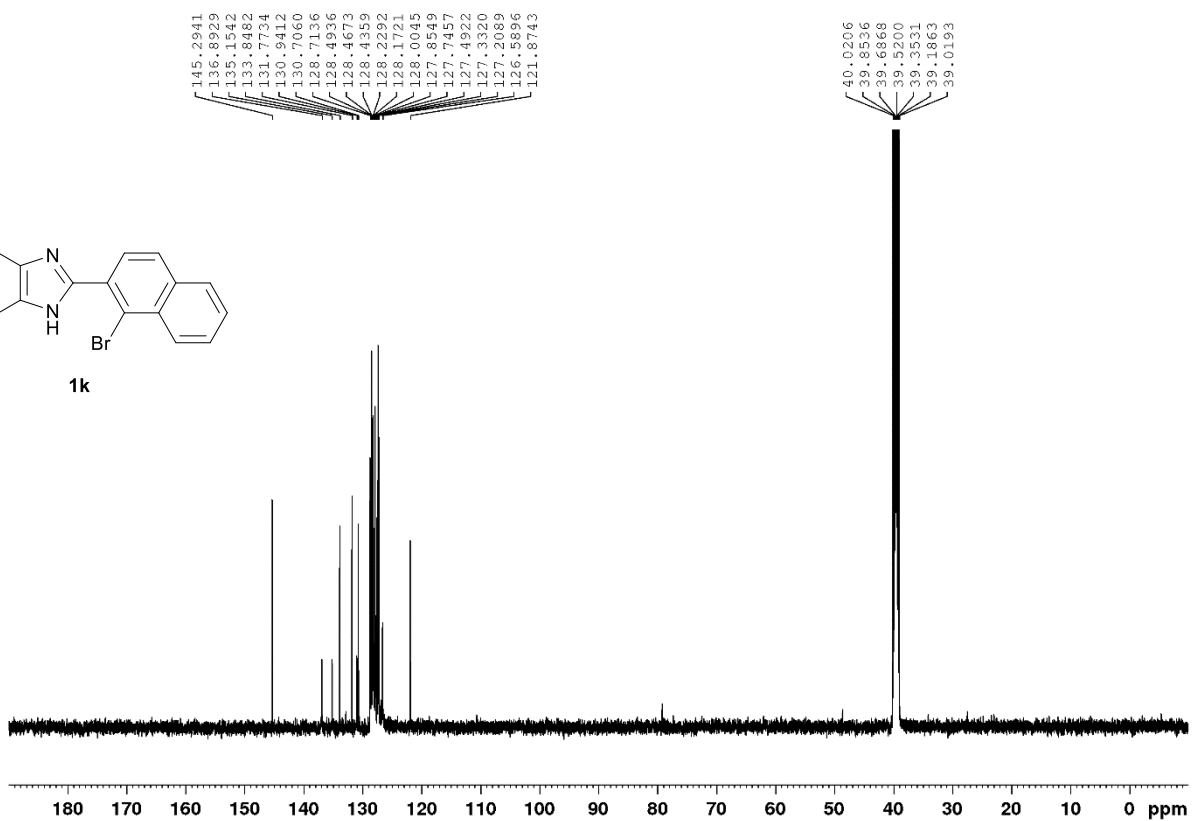

11

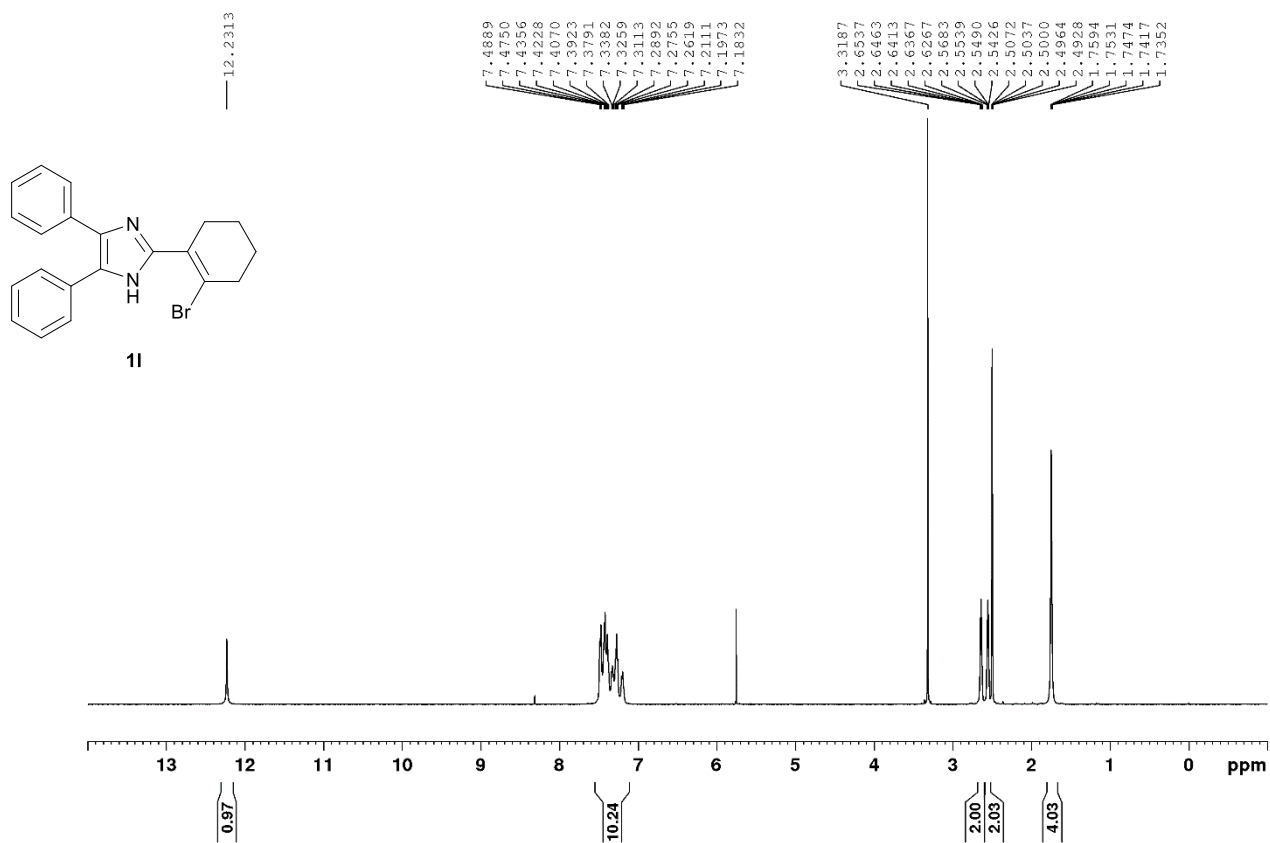

11

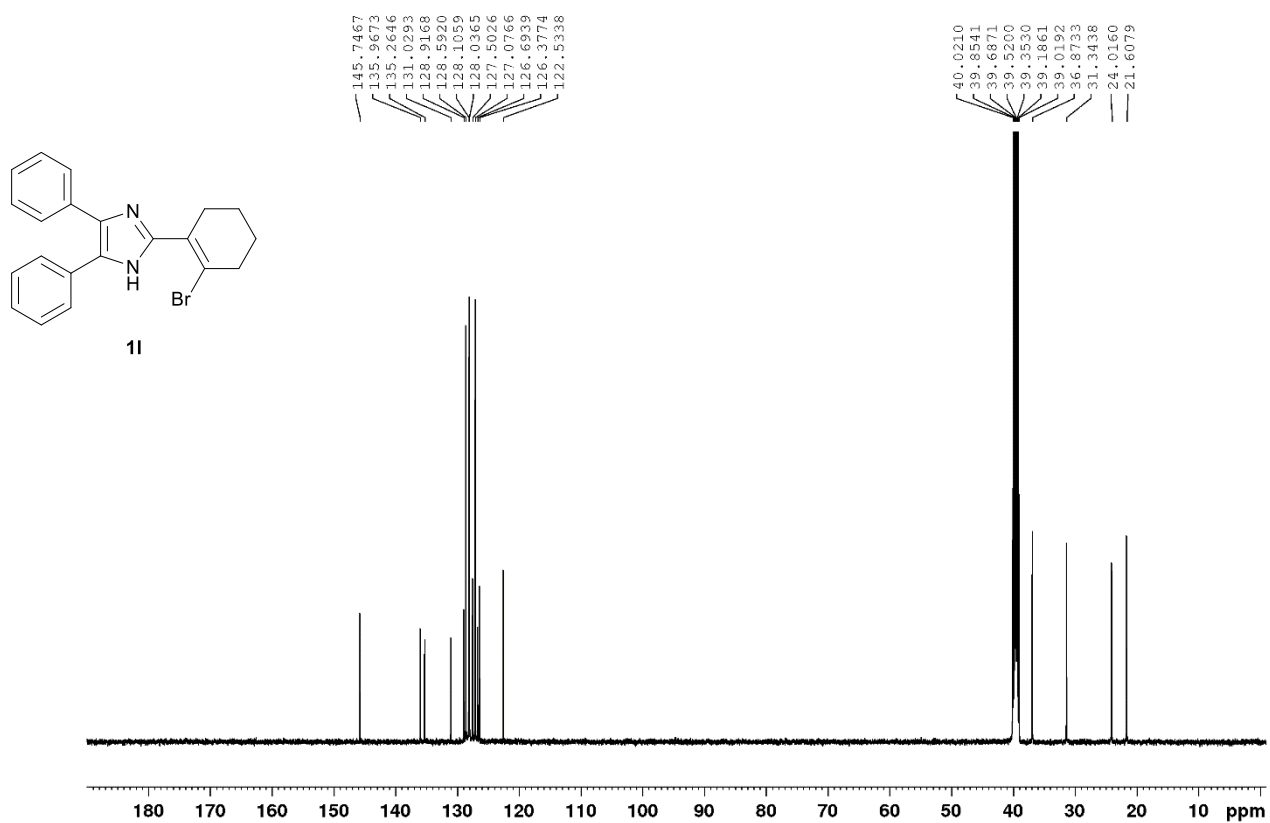



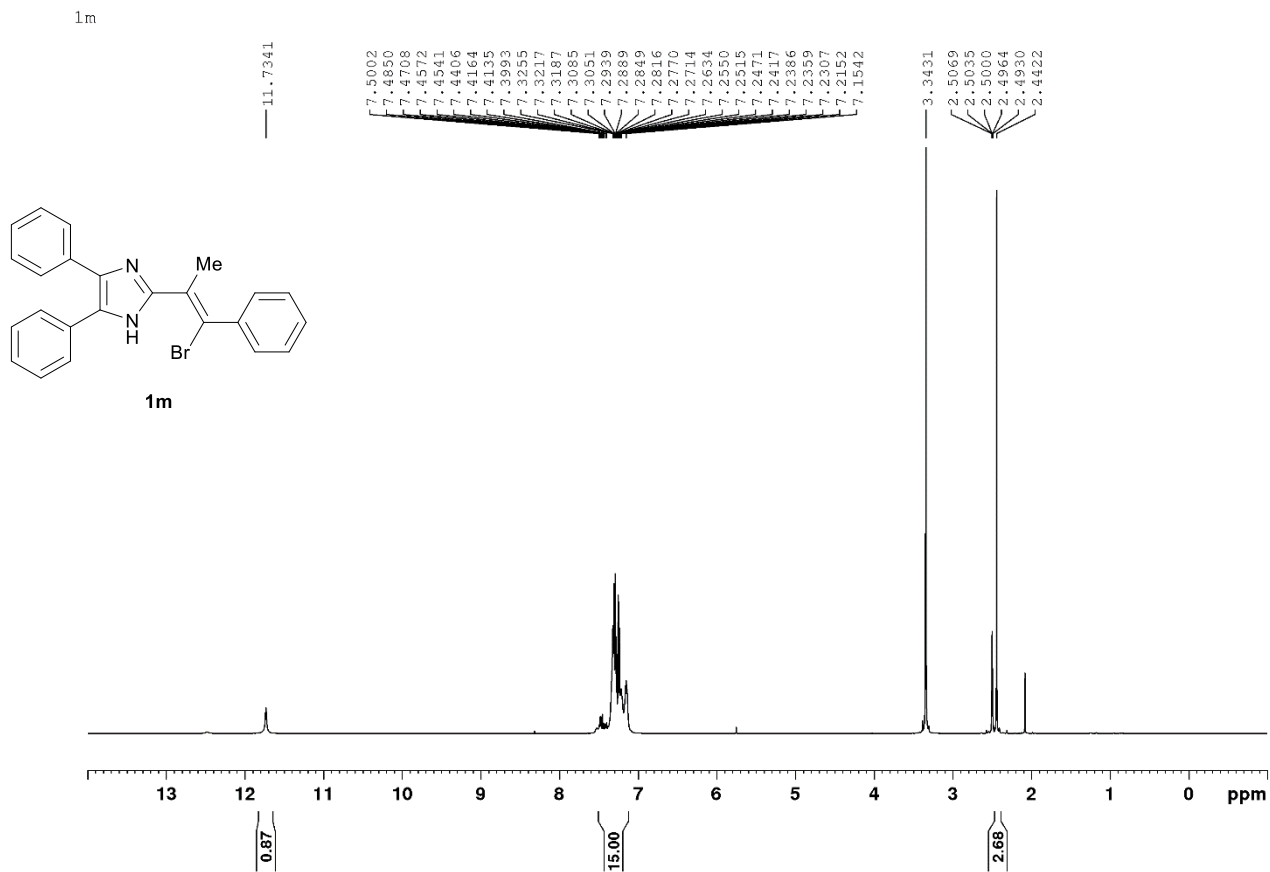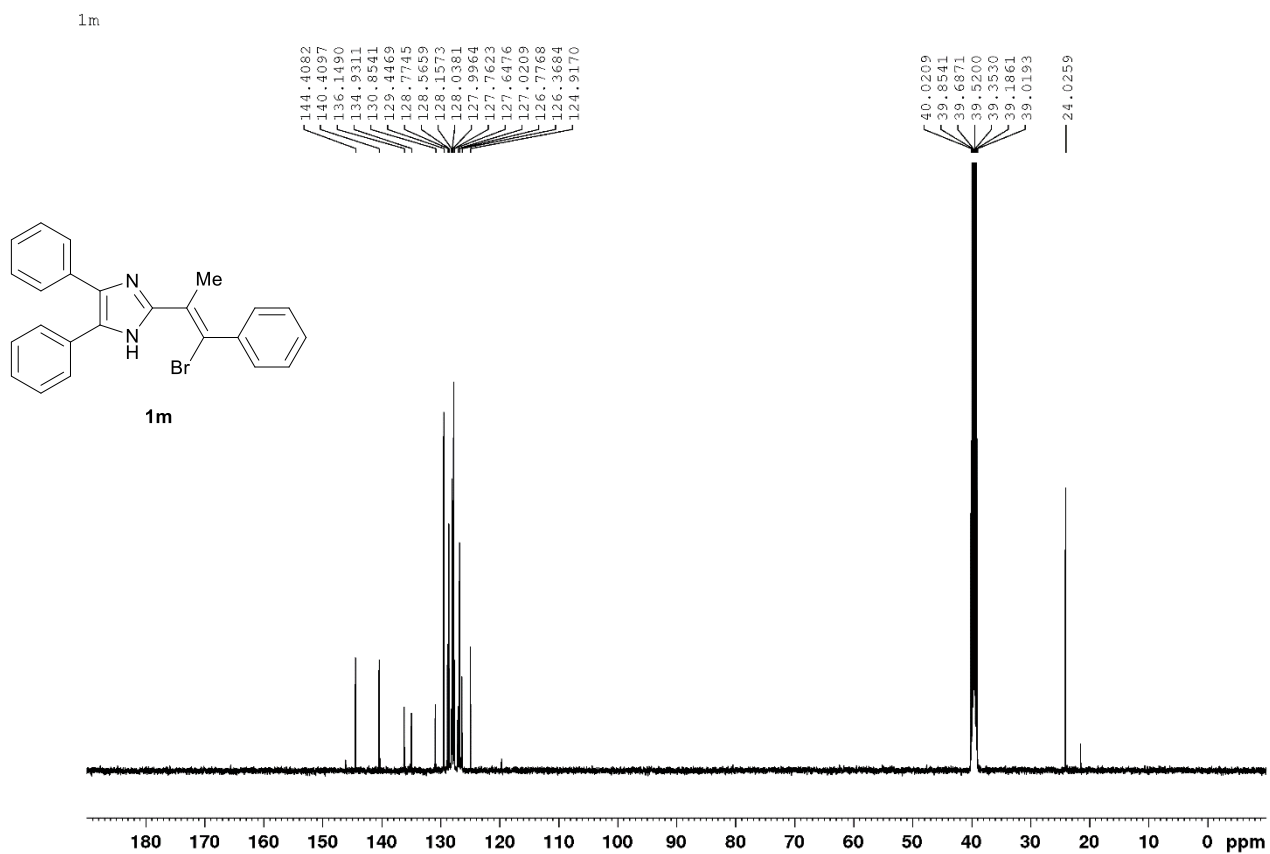

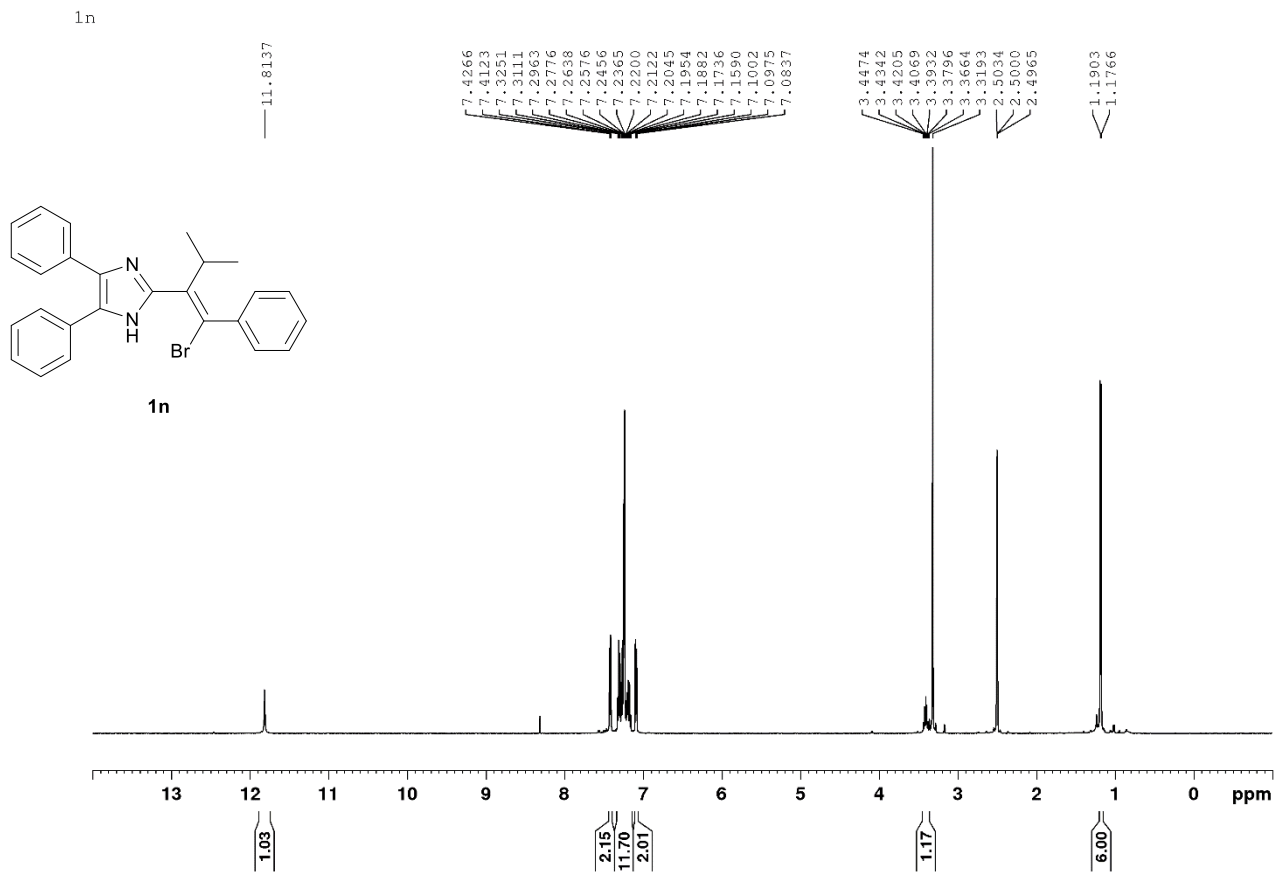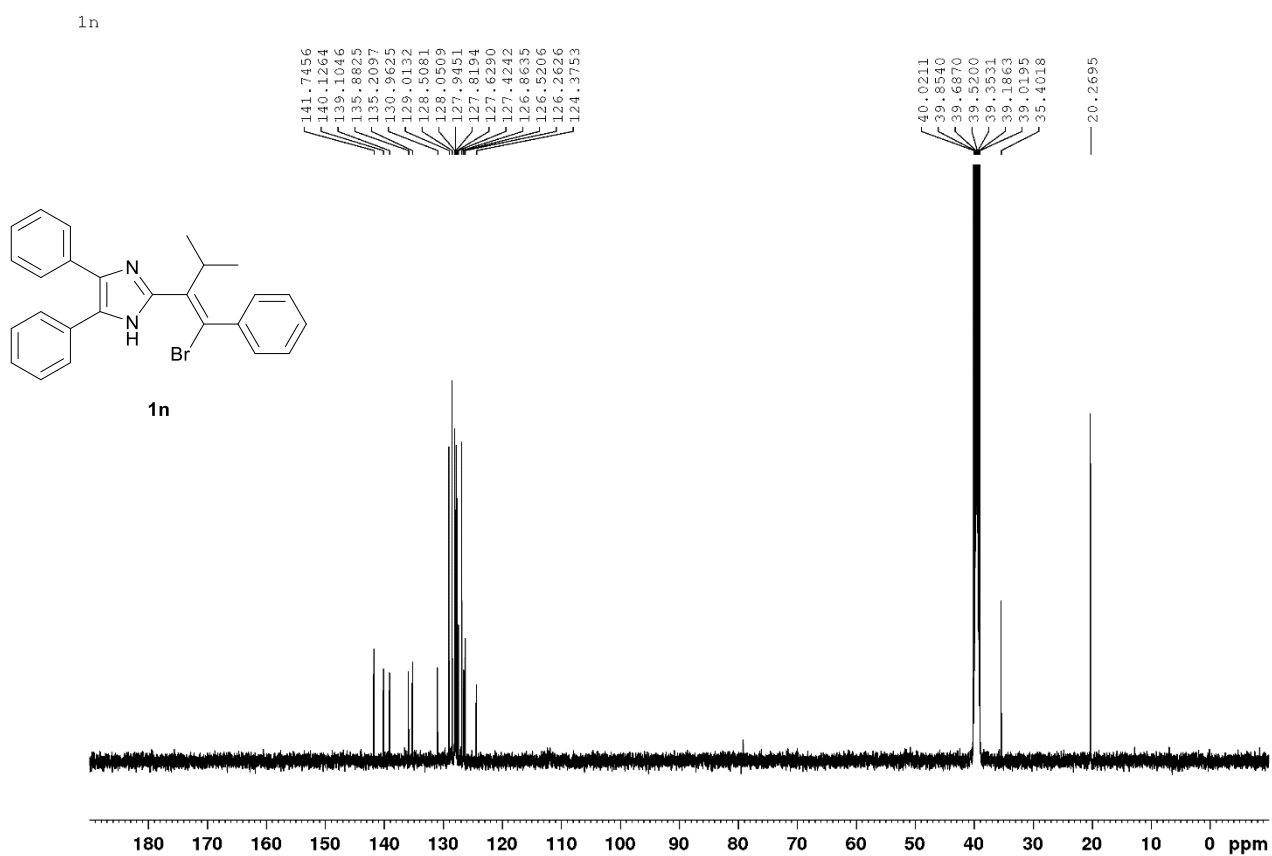

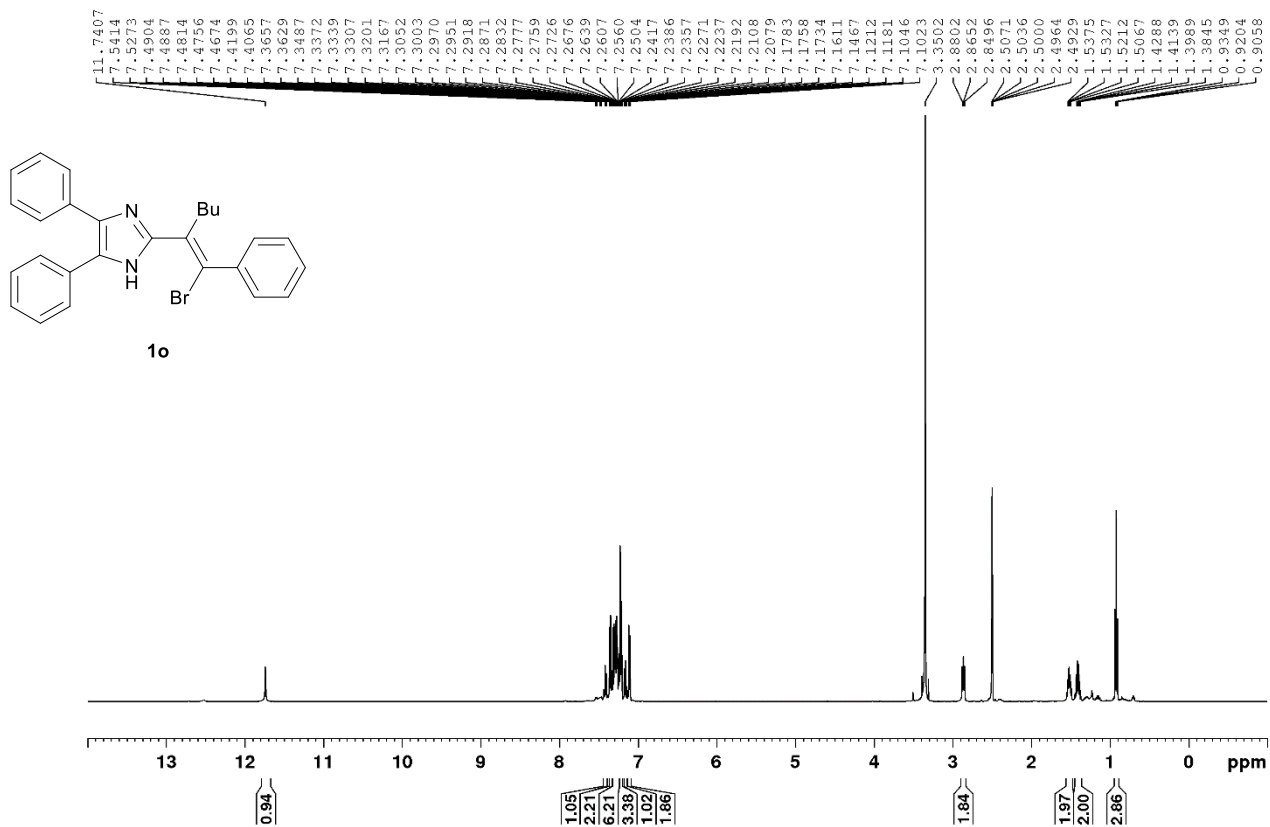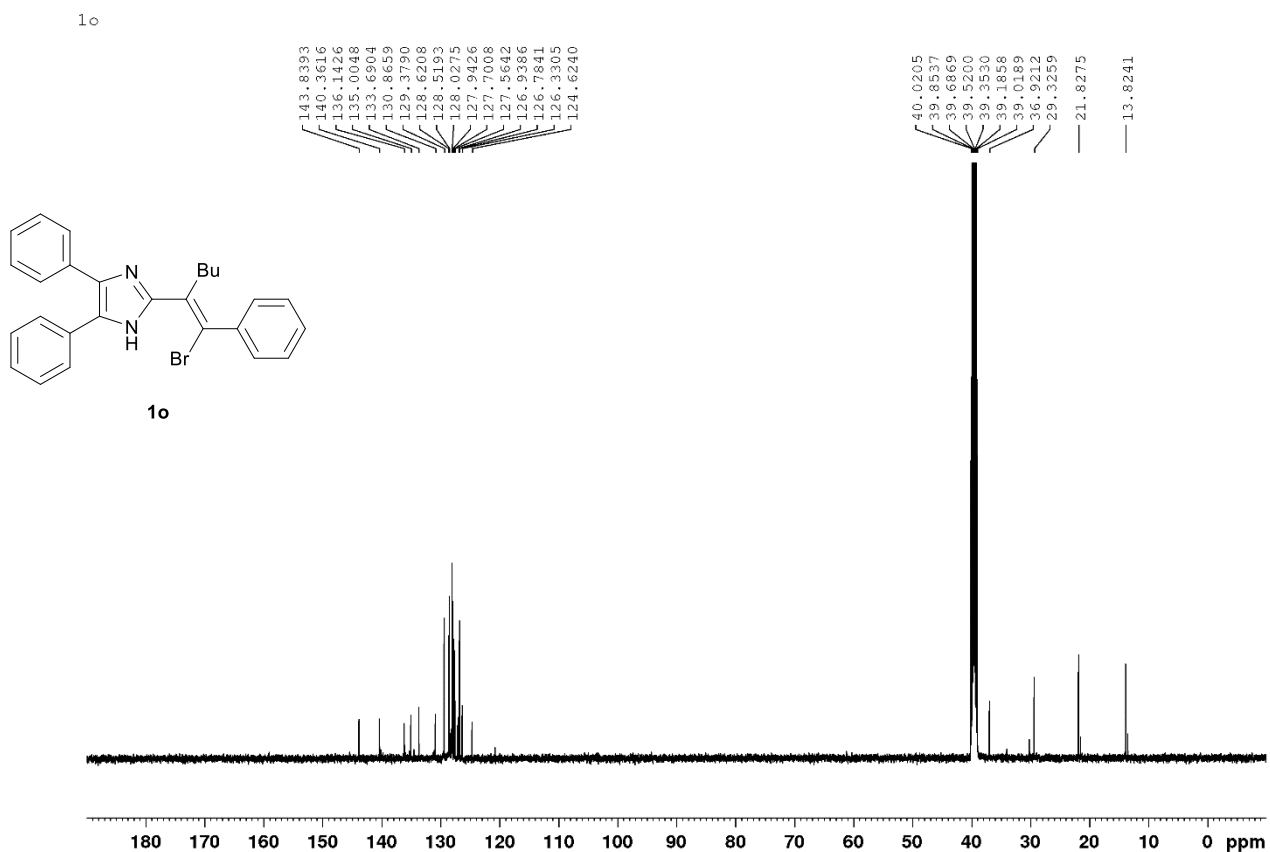

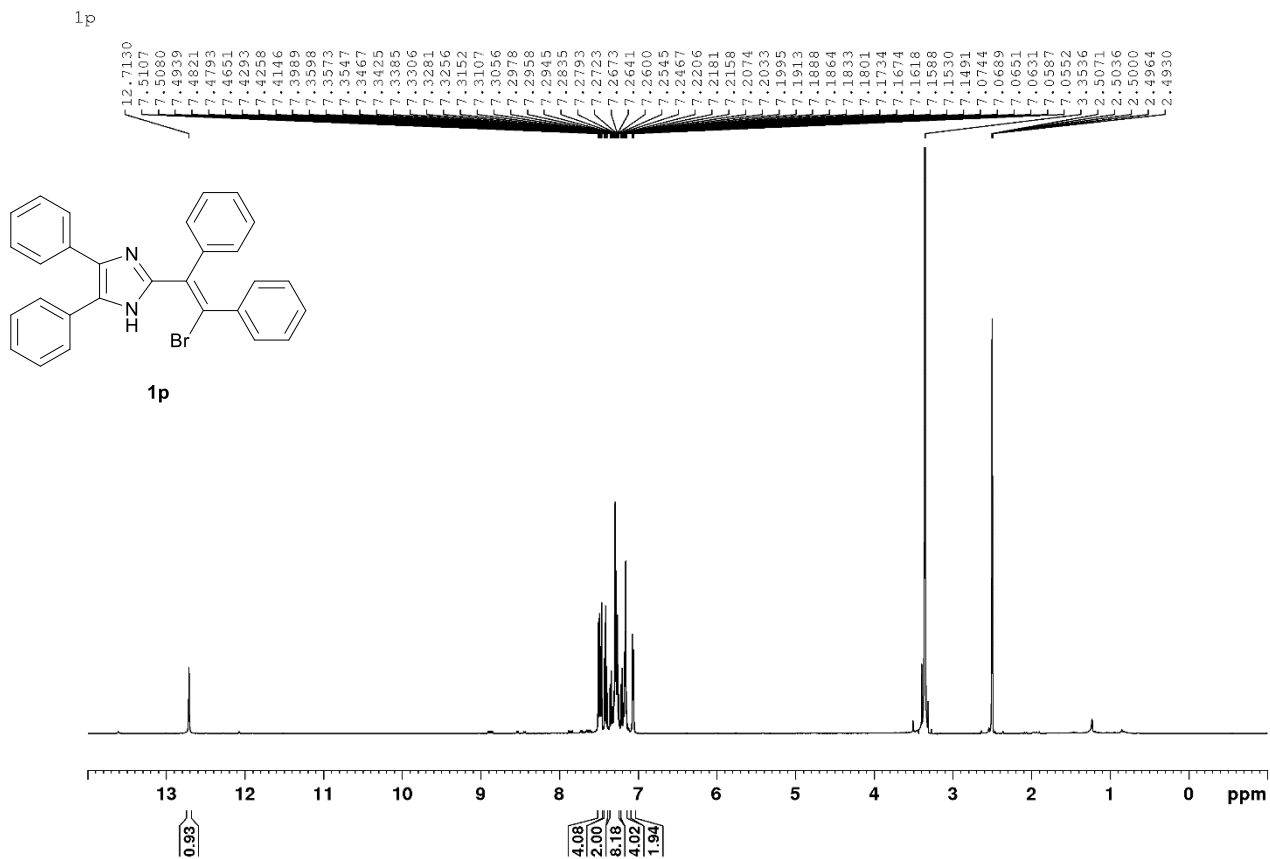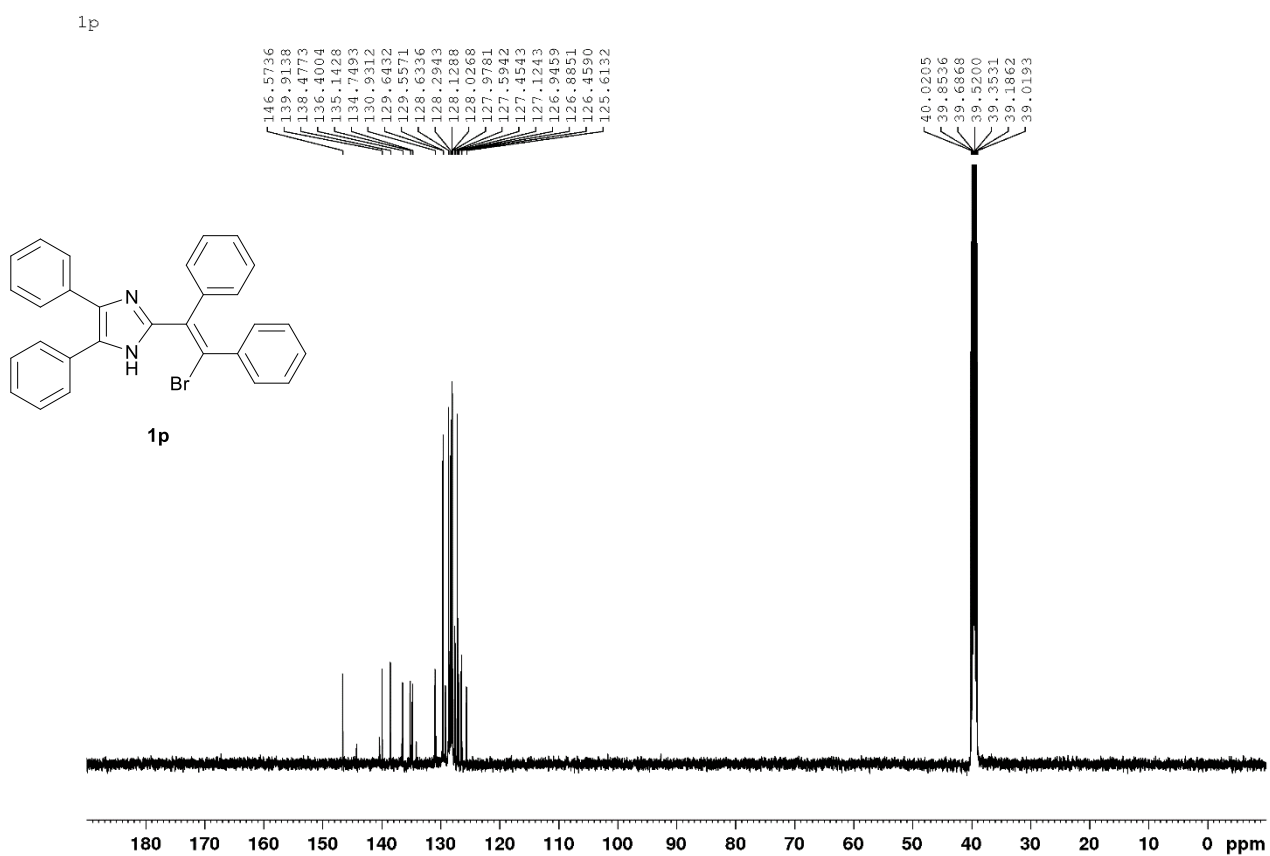

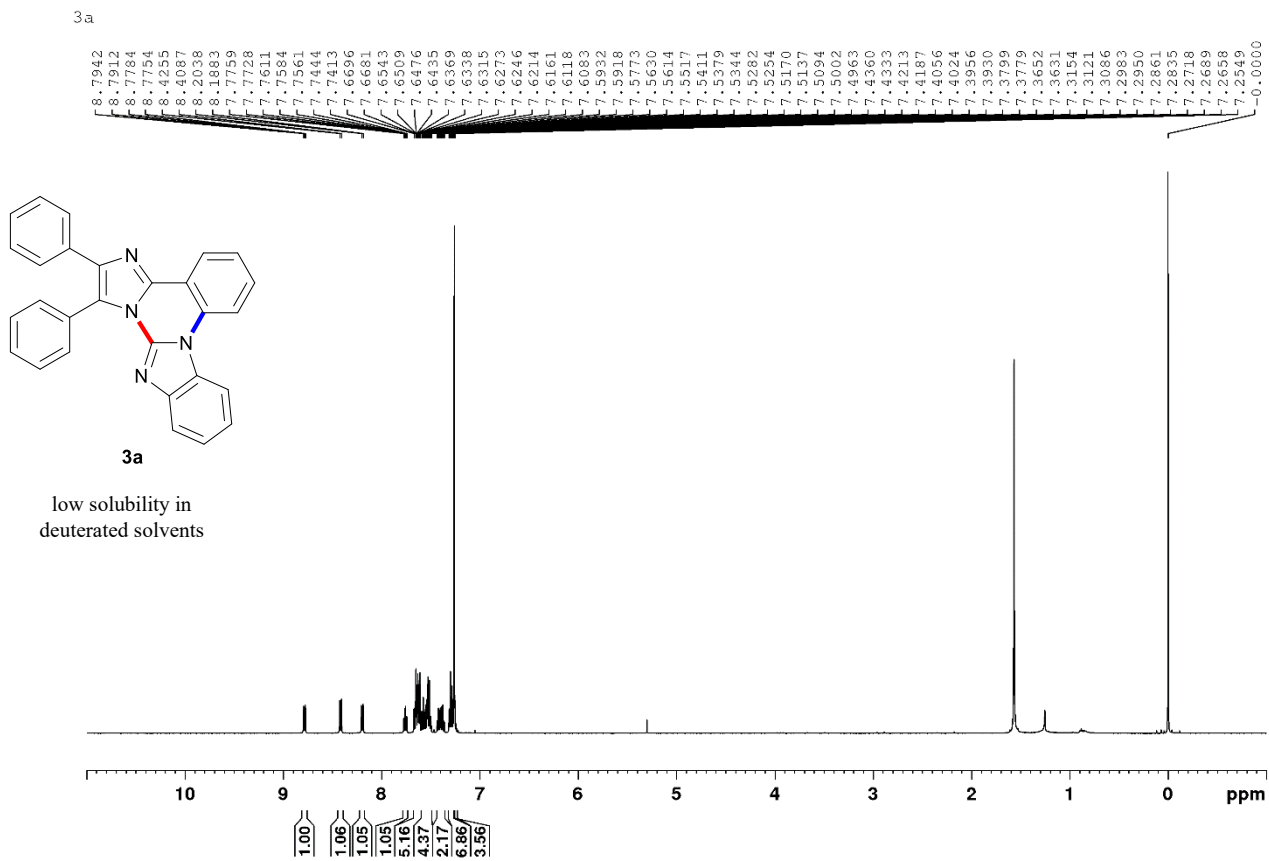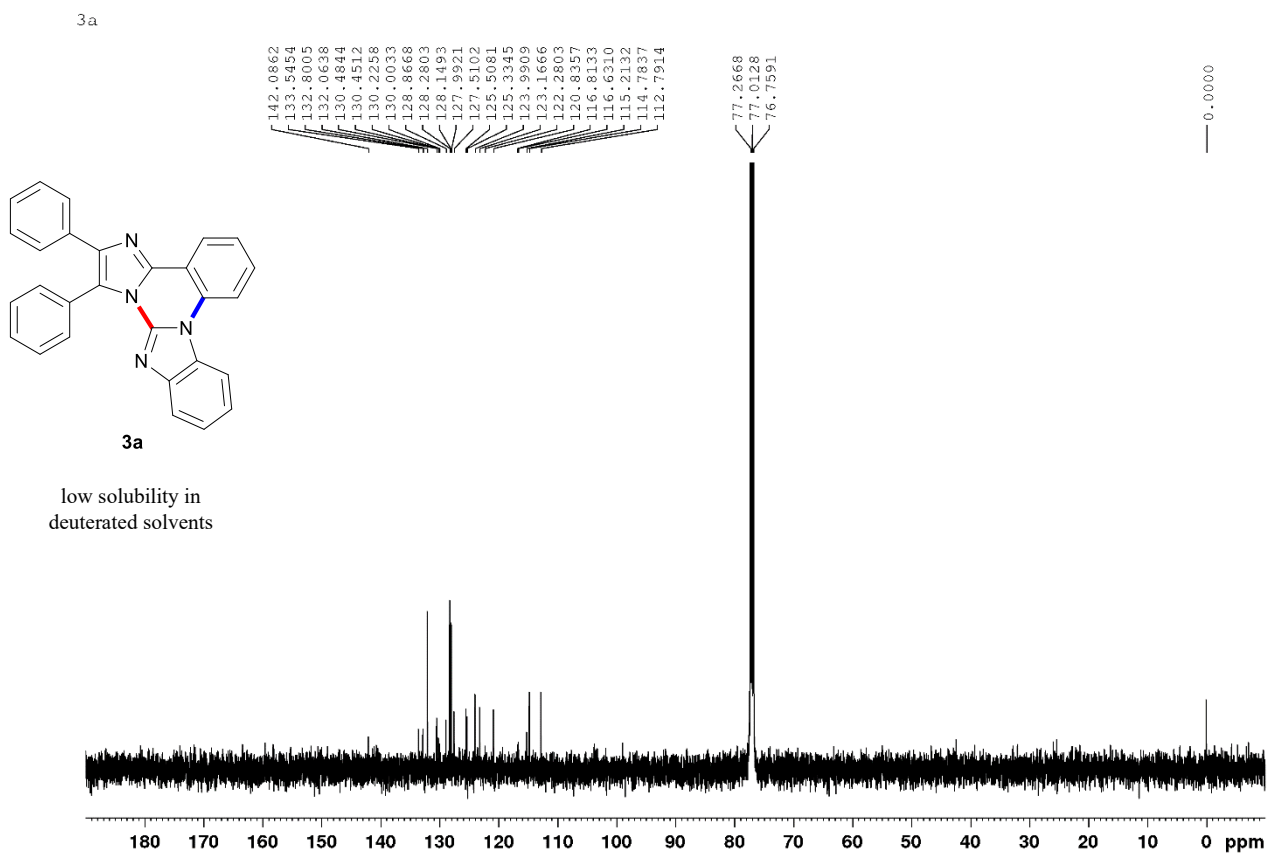

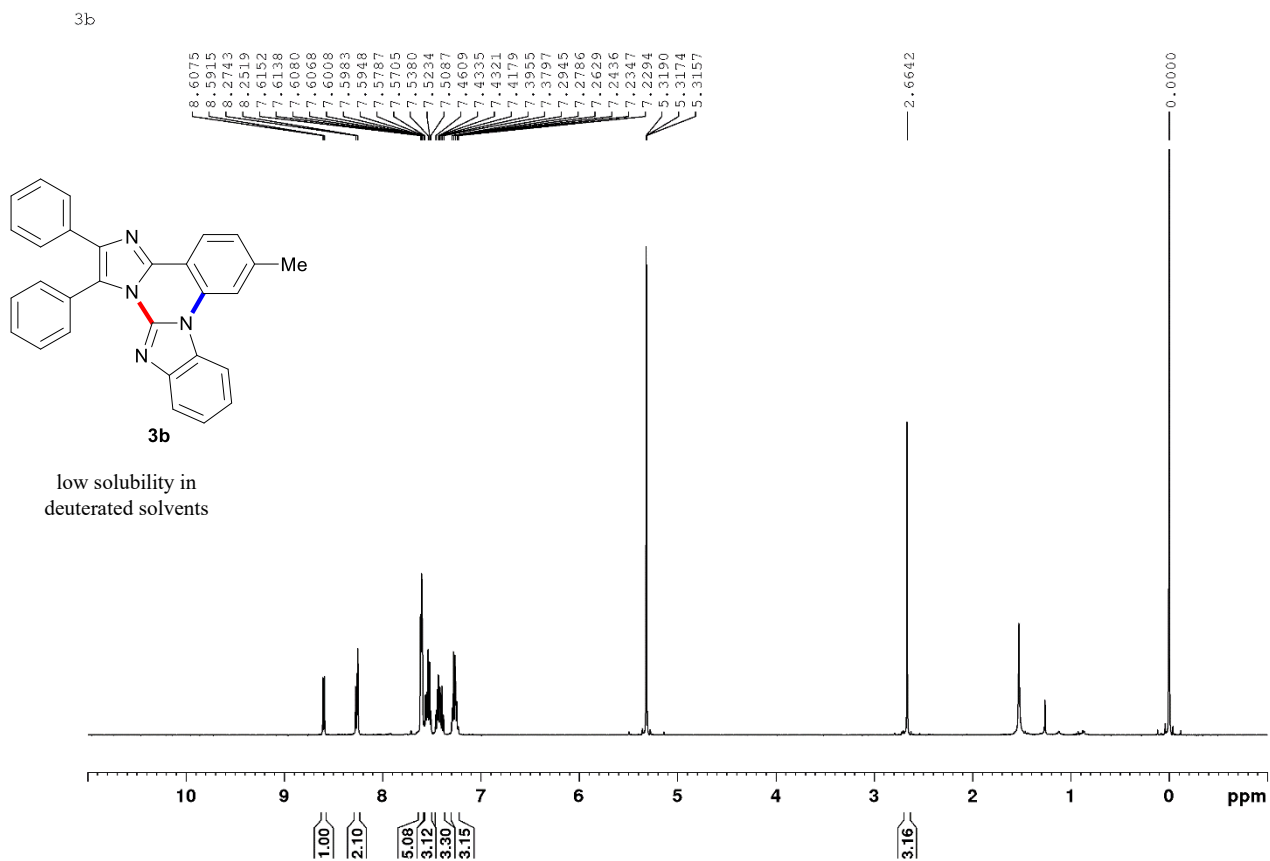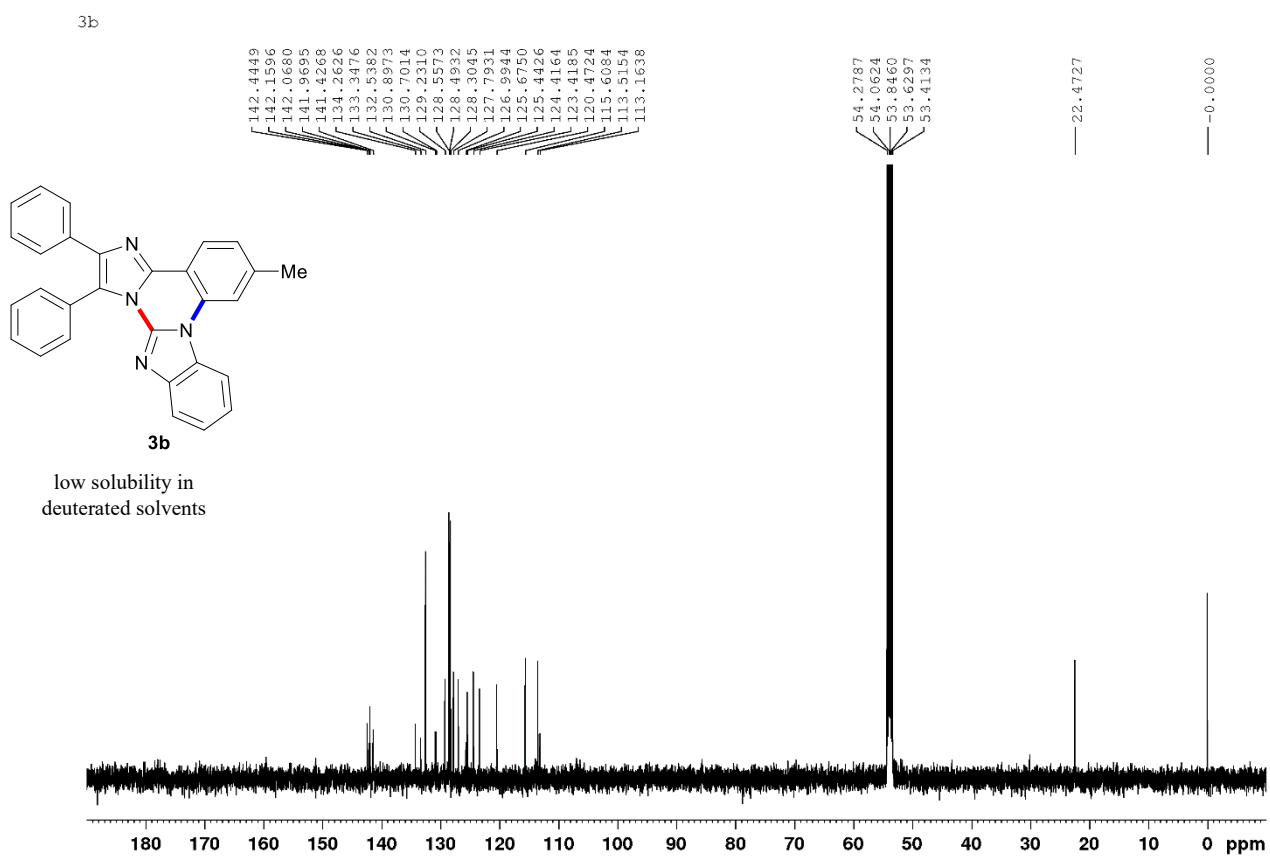

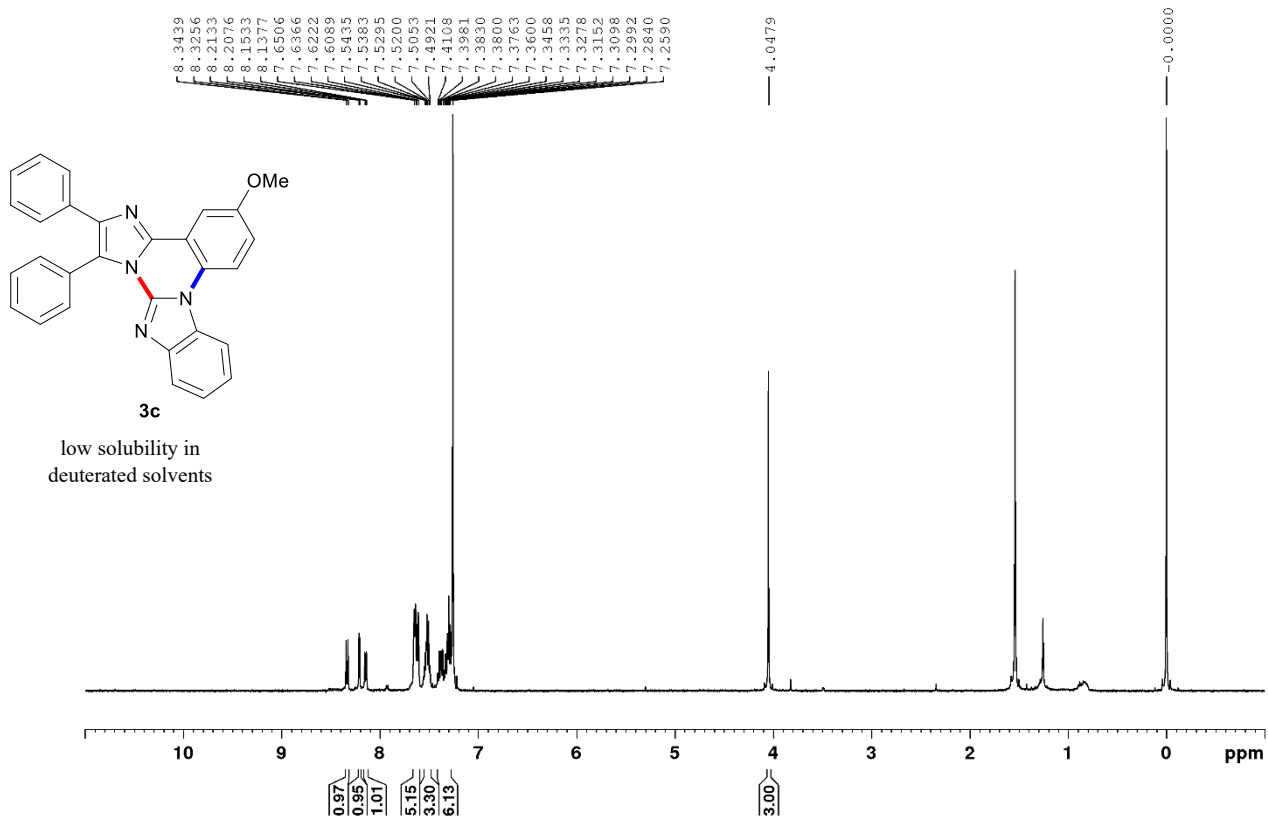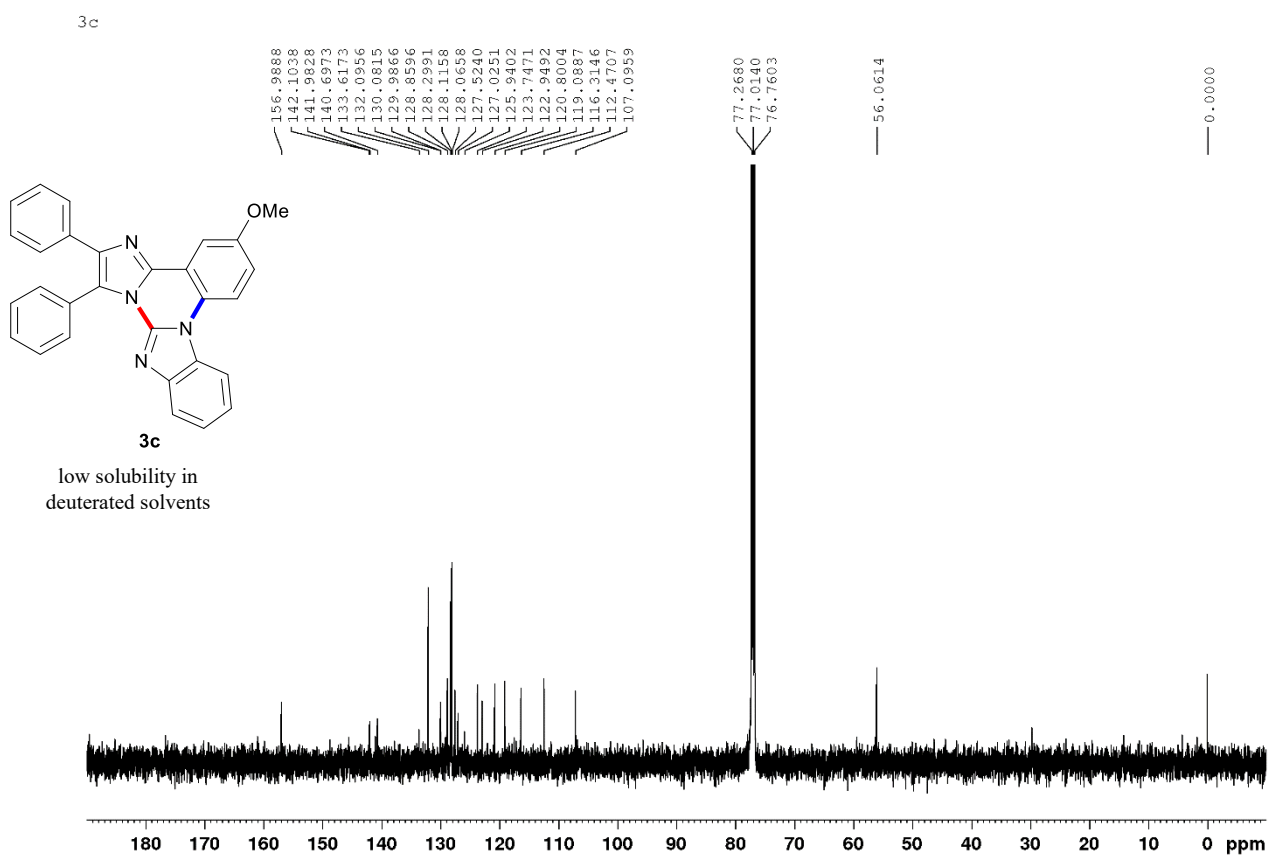

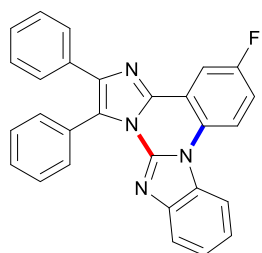

**3d**

low solubility in deuterated solvents

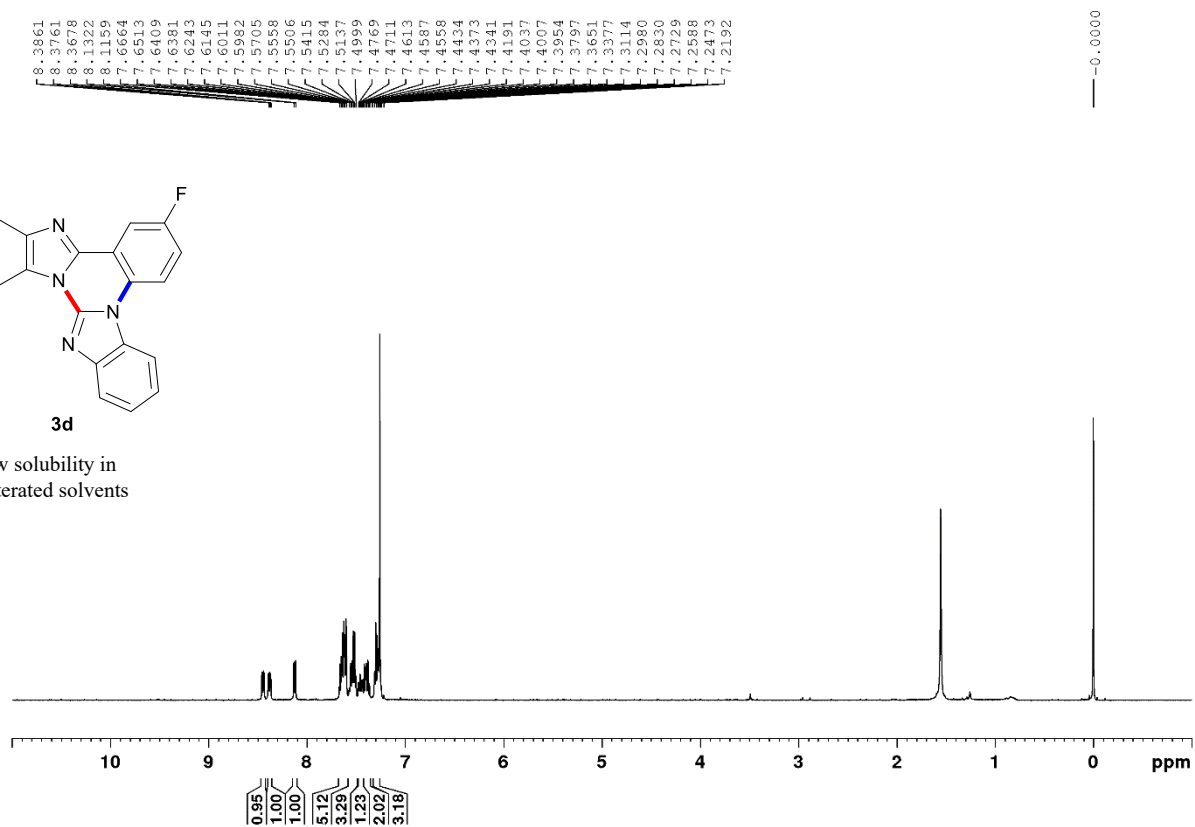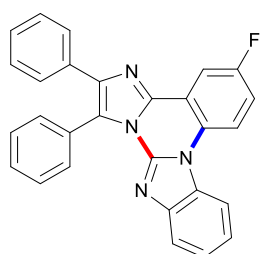

**3d**

low solubility in deuterated solvents

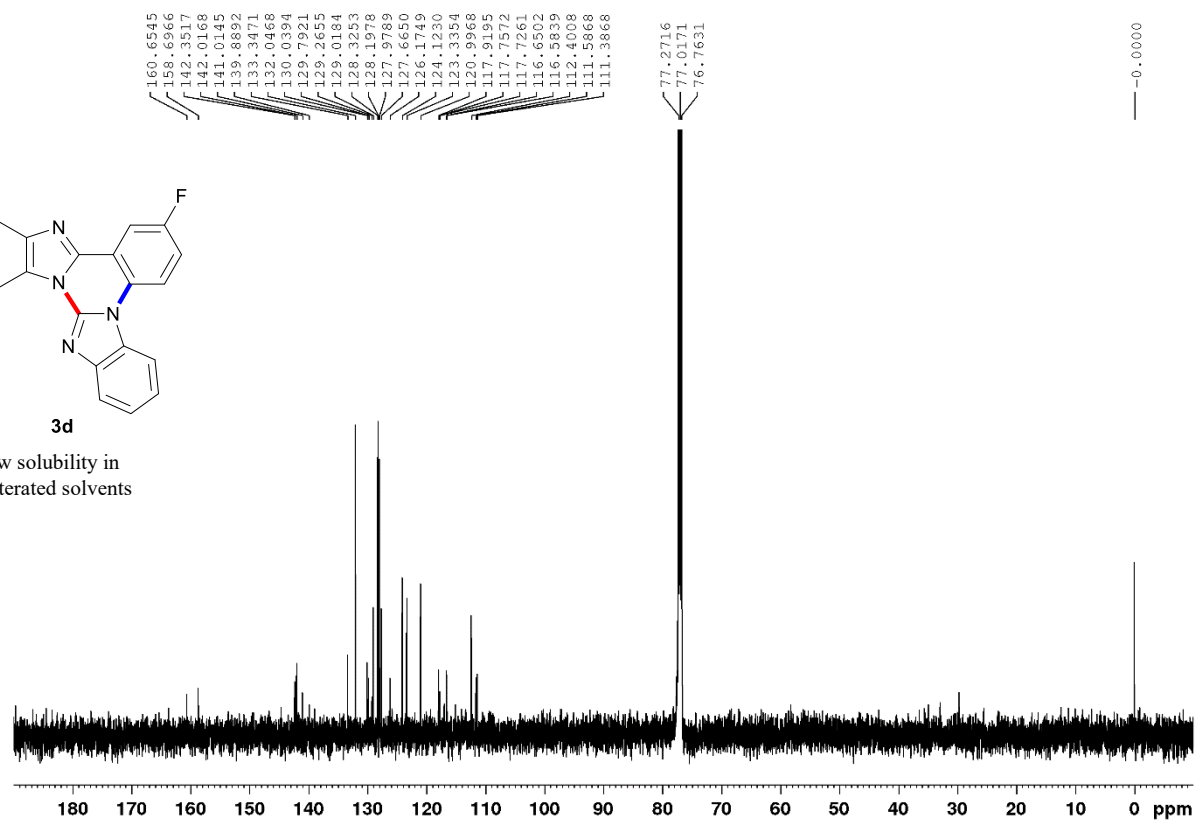



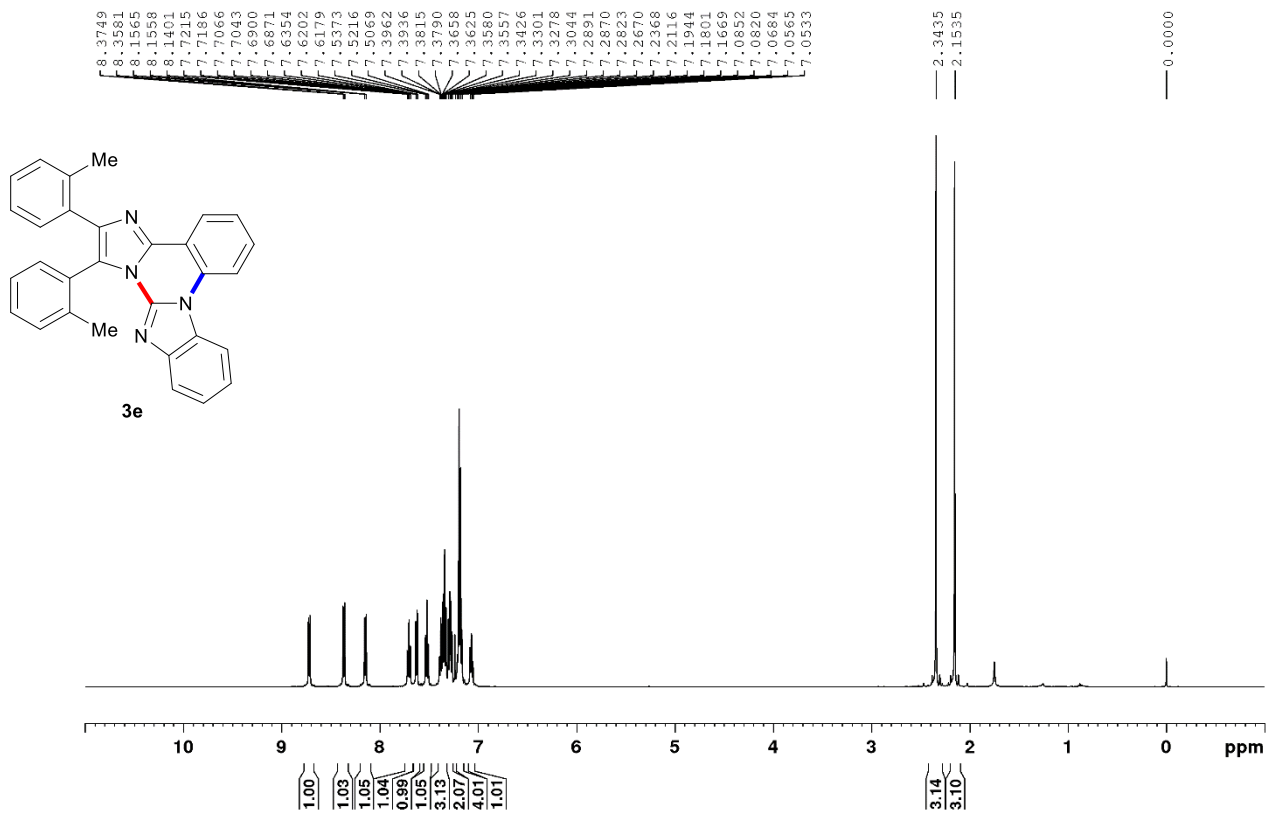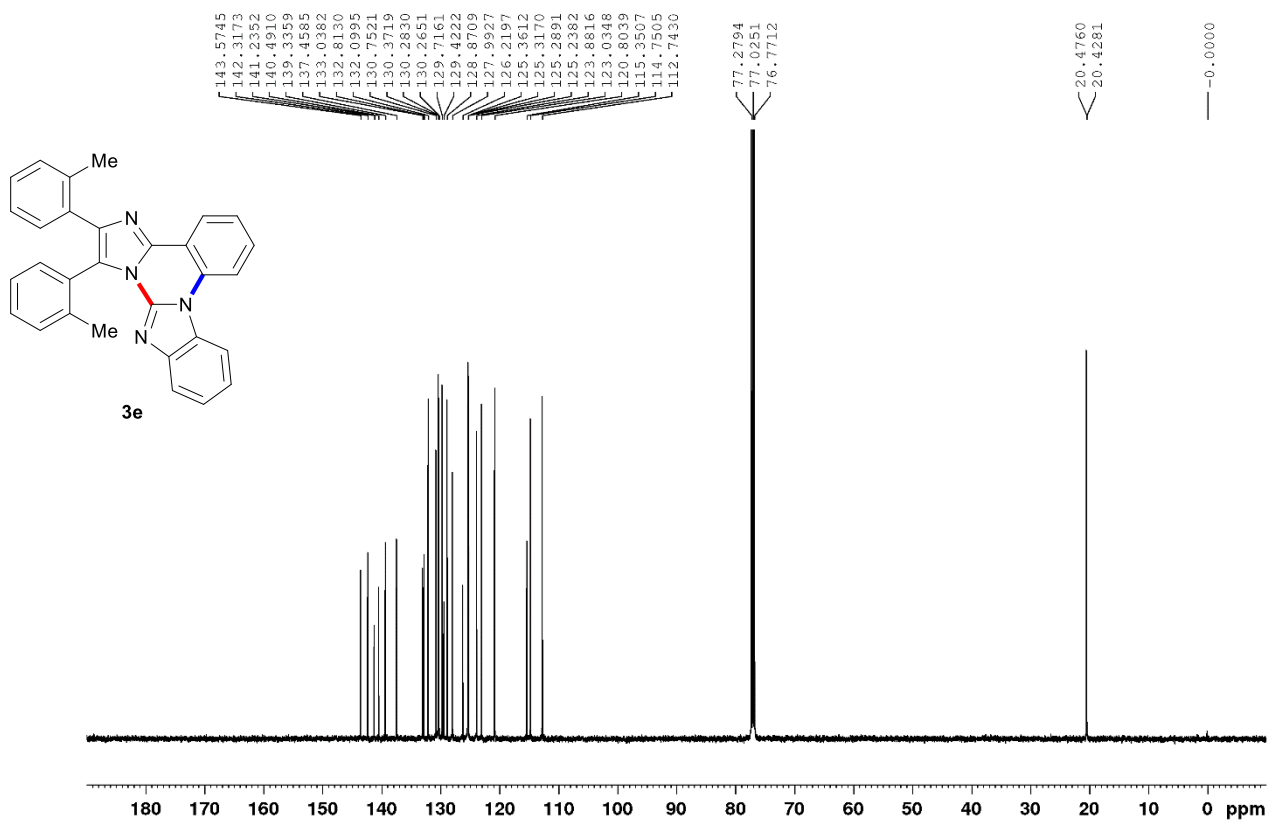

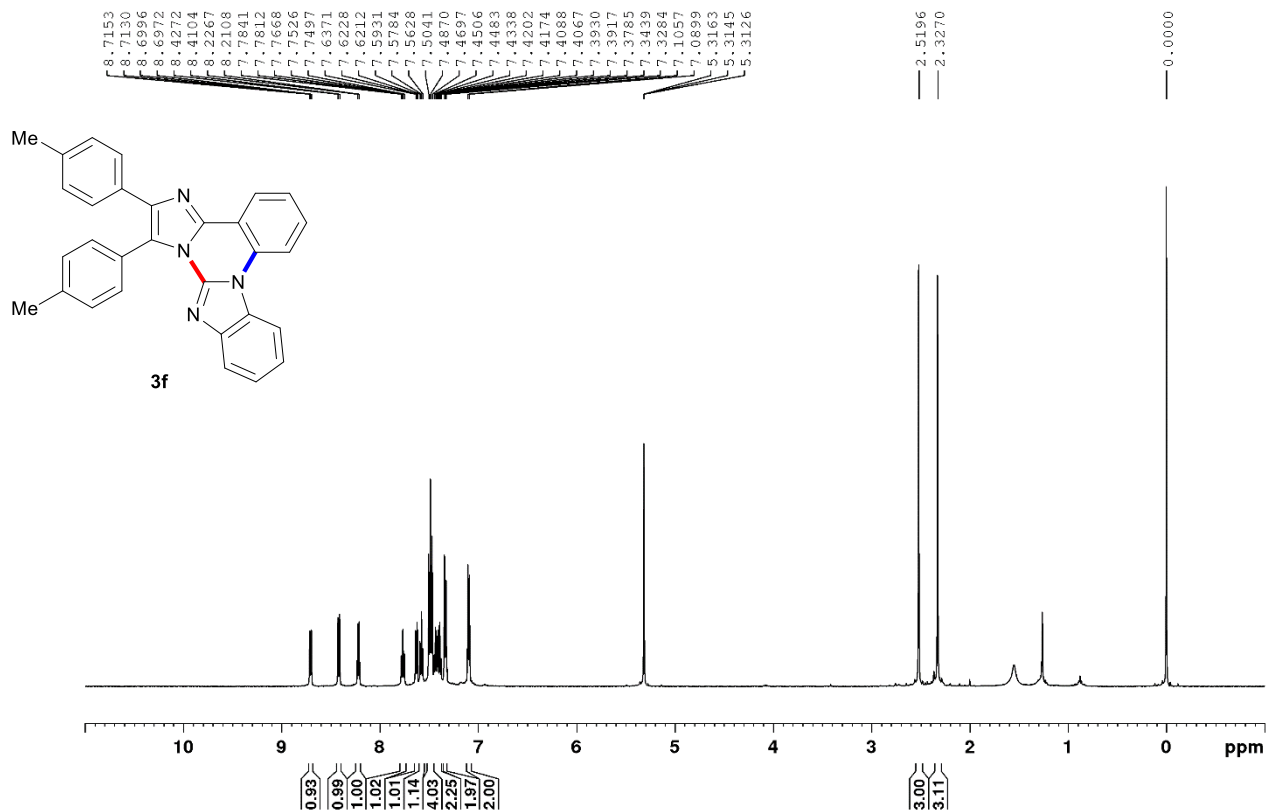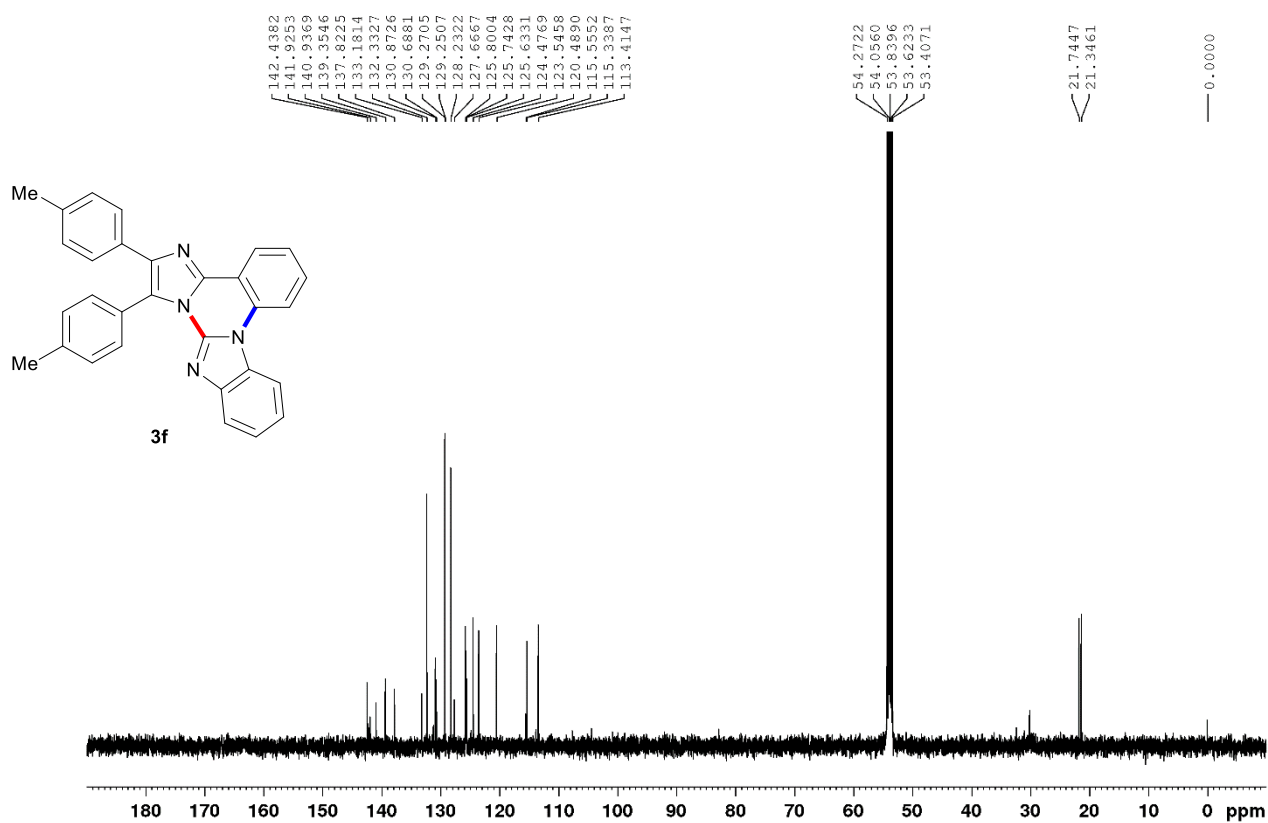

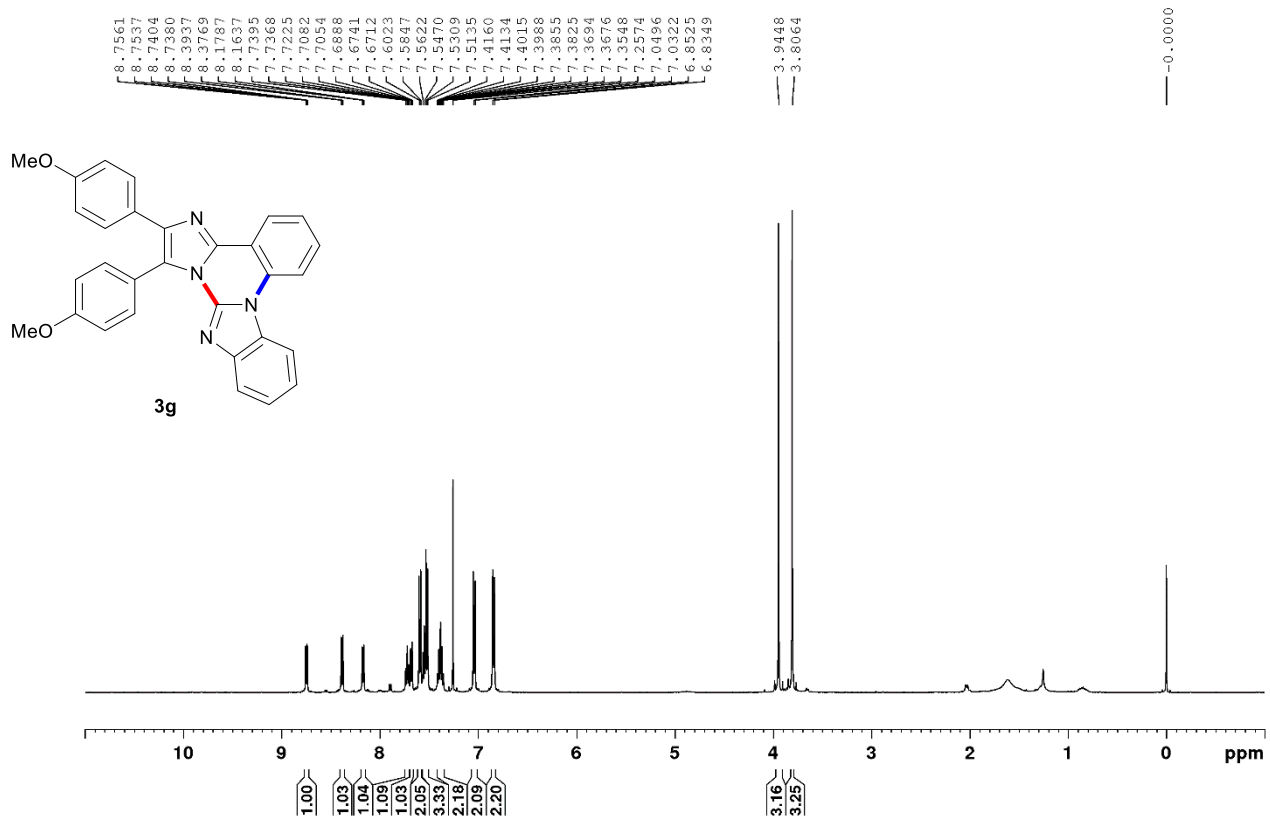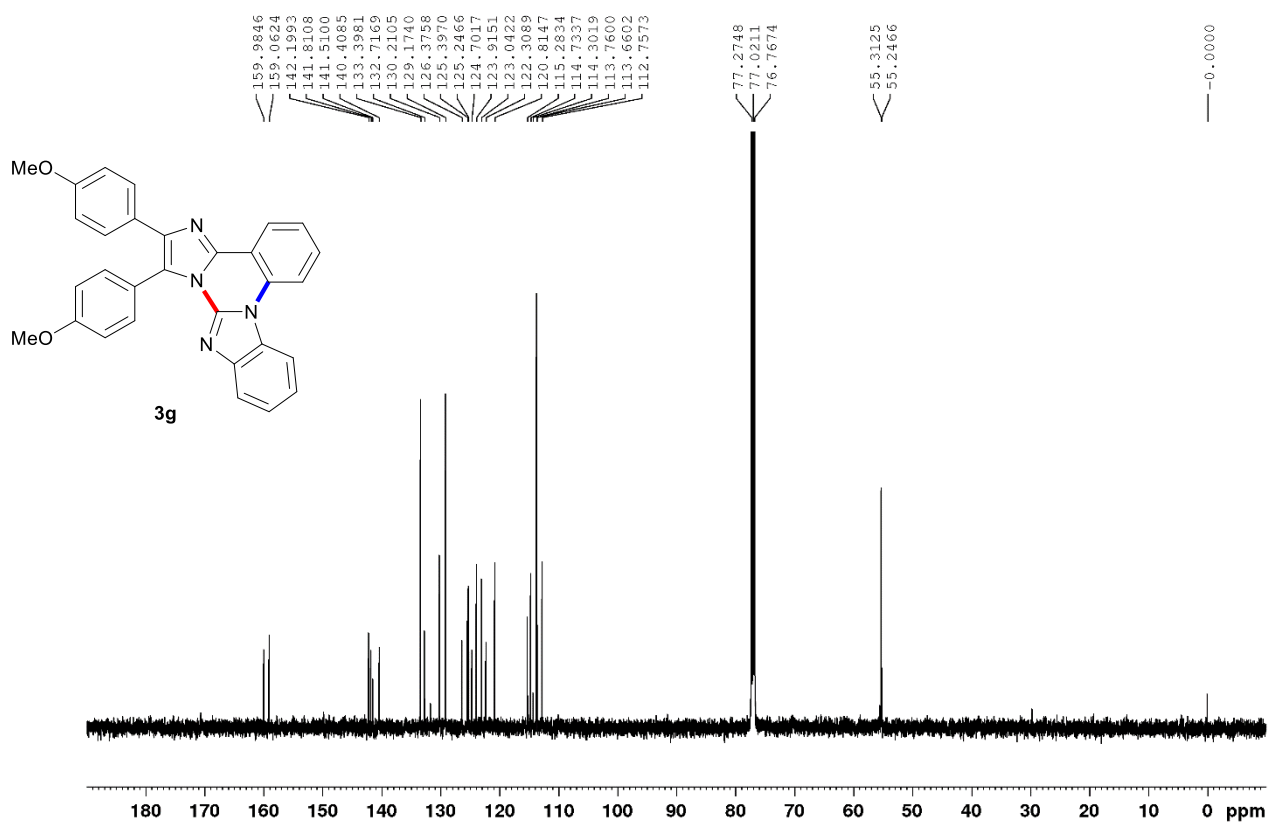

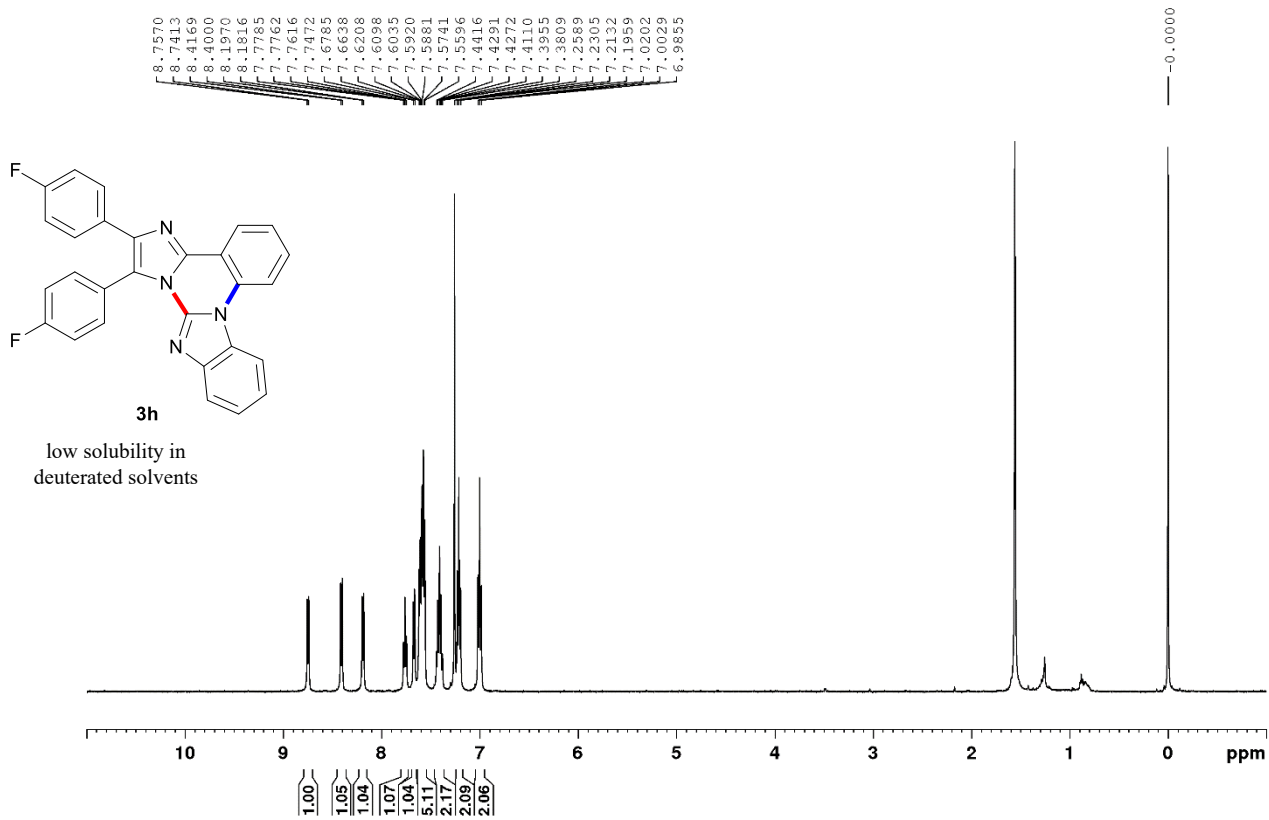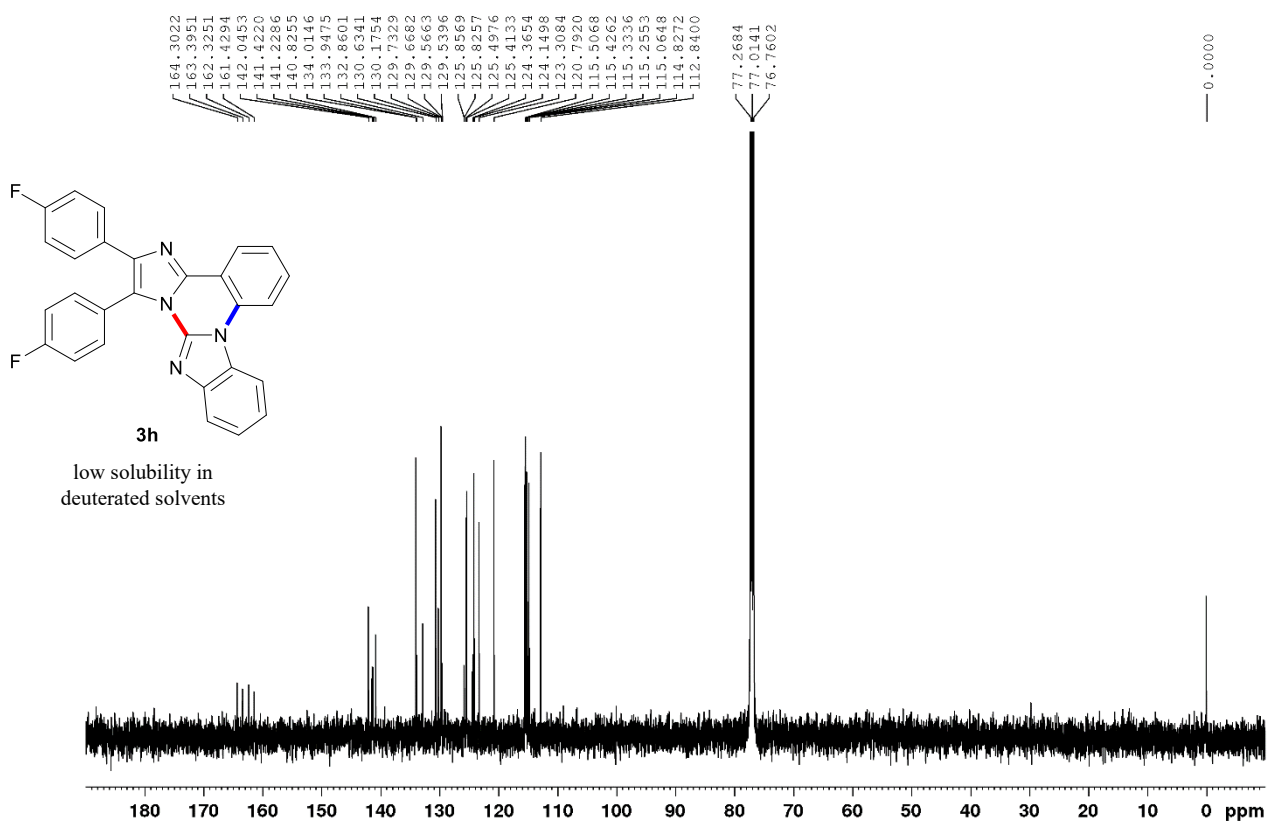

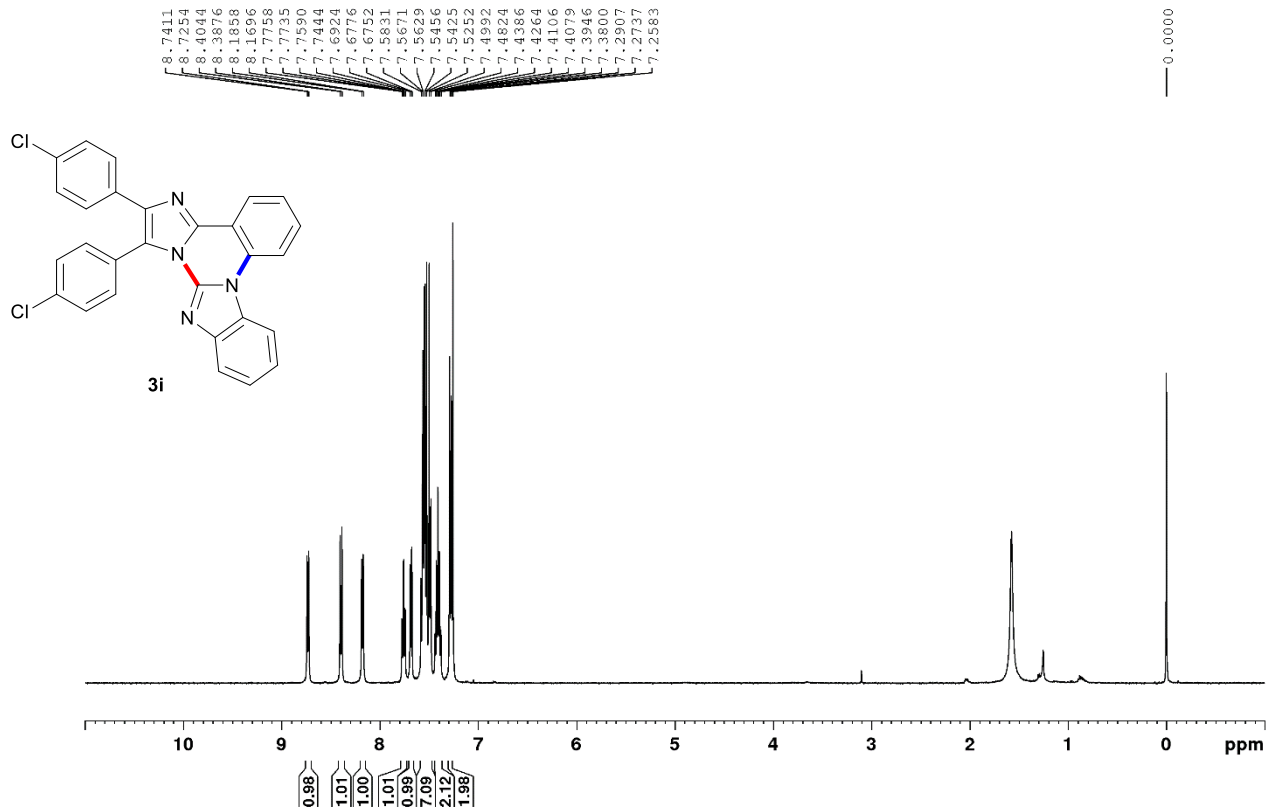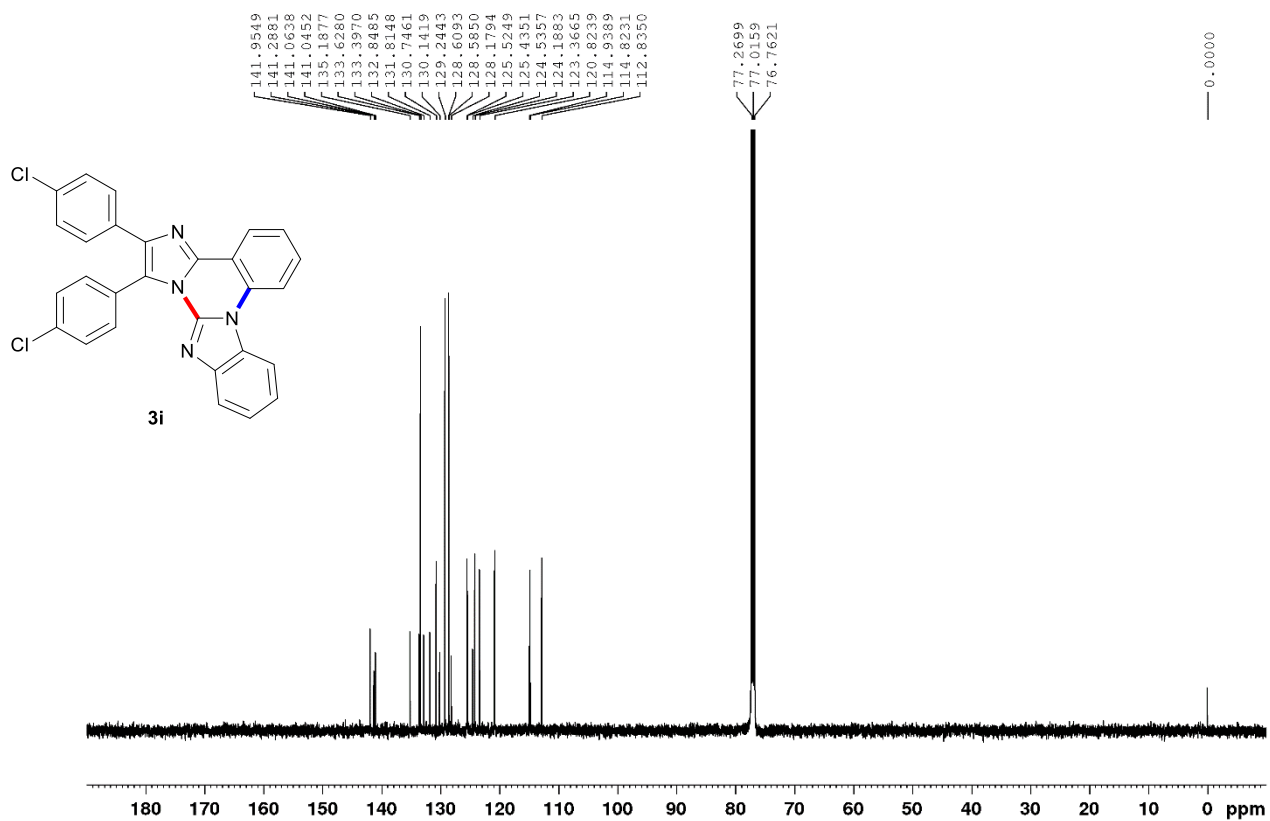

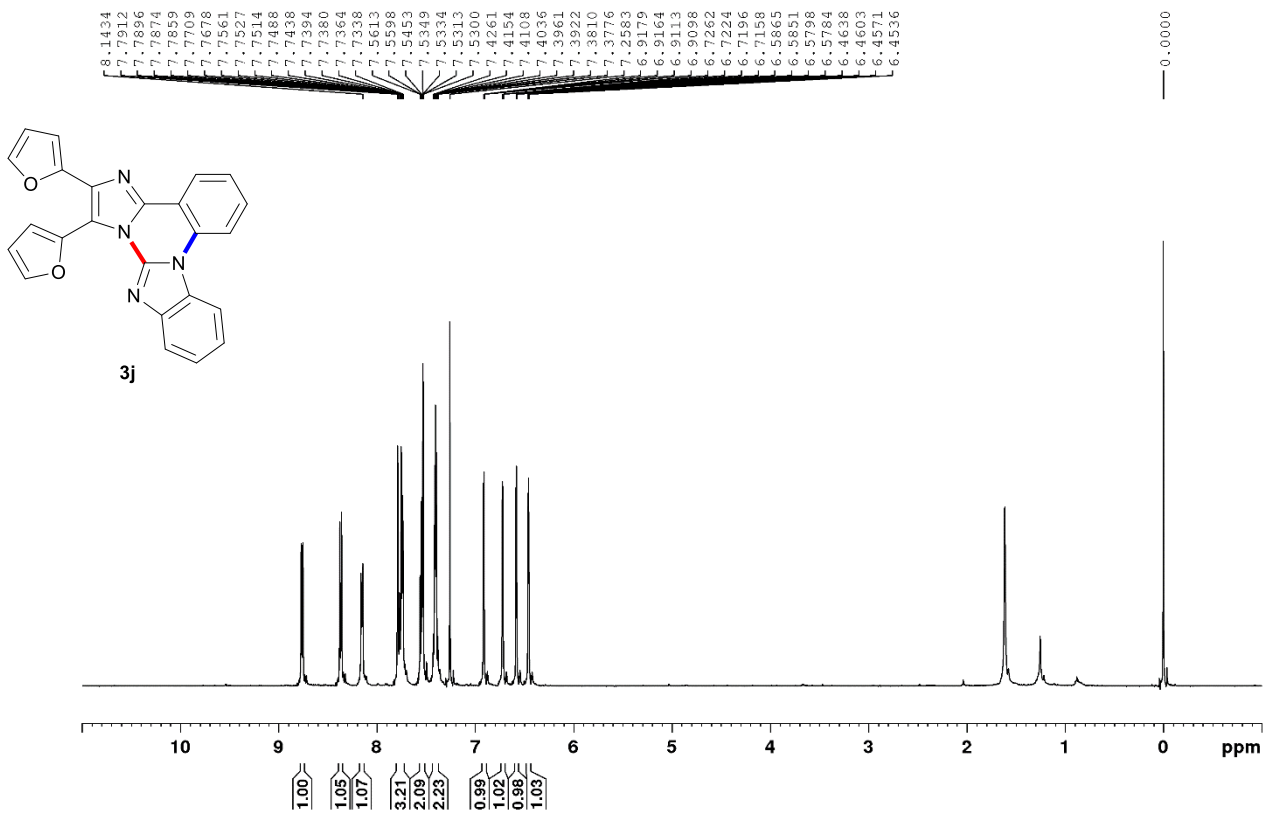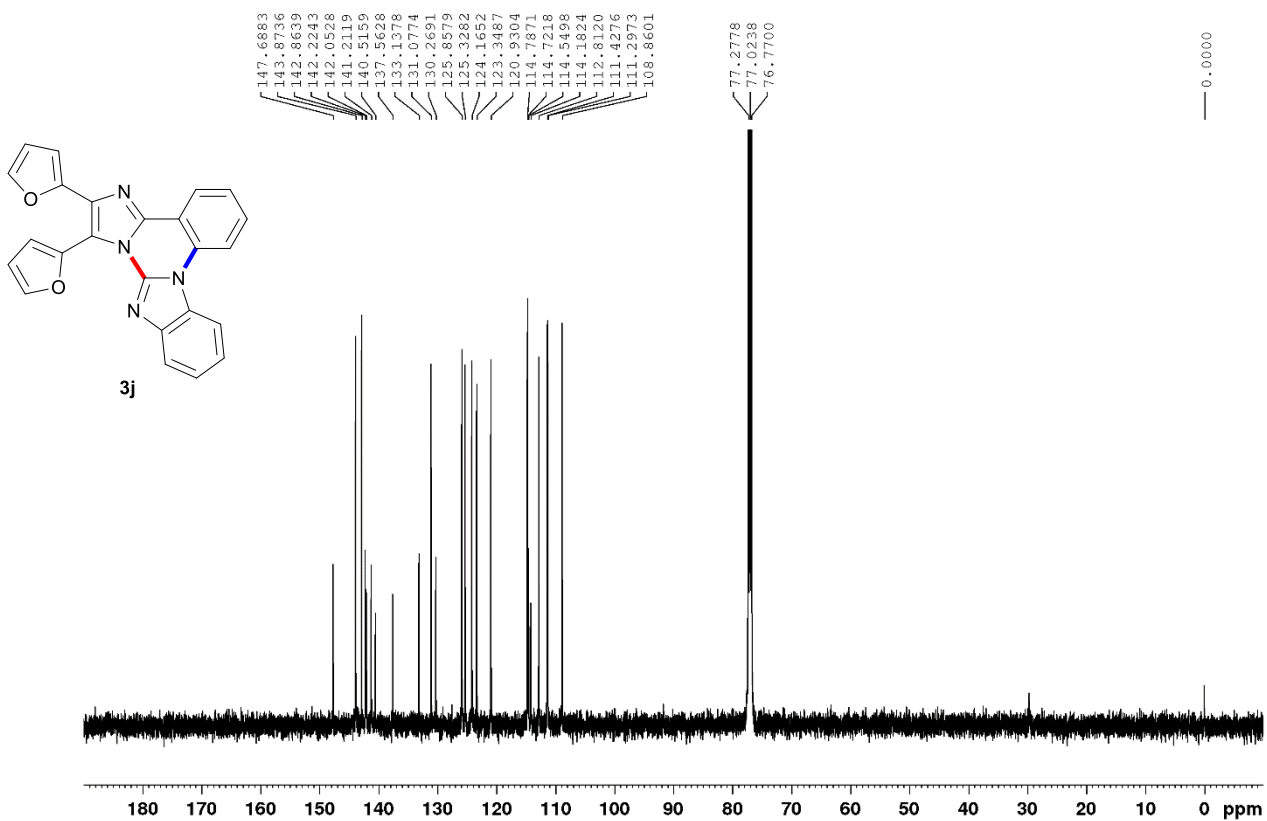

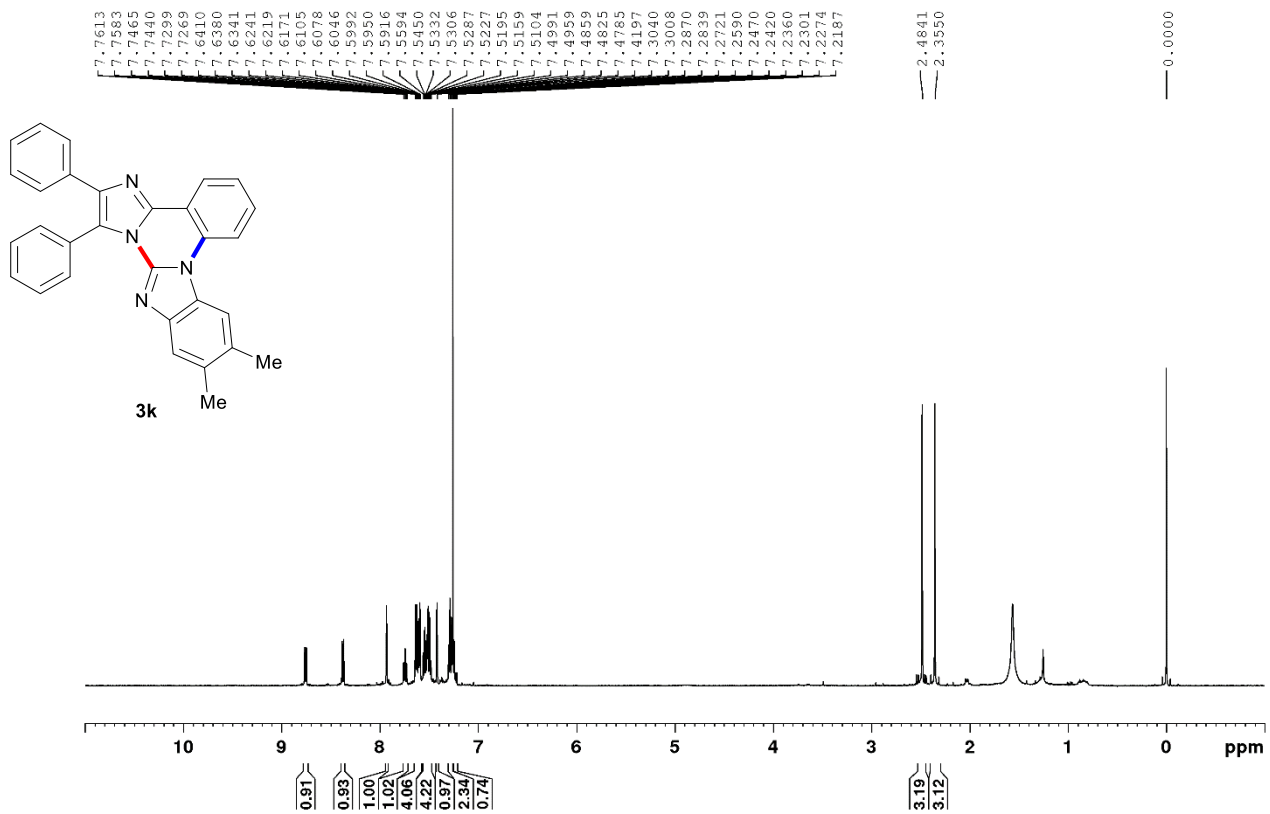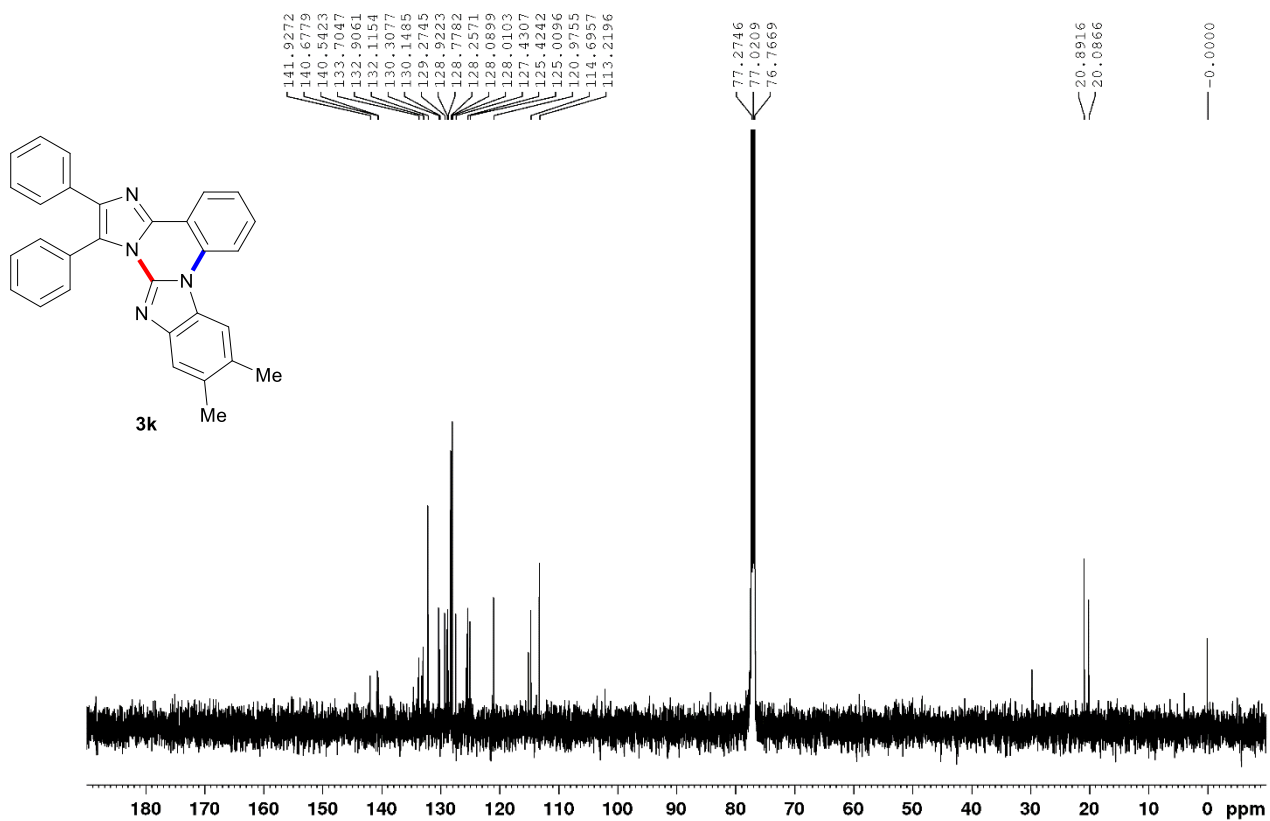

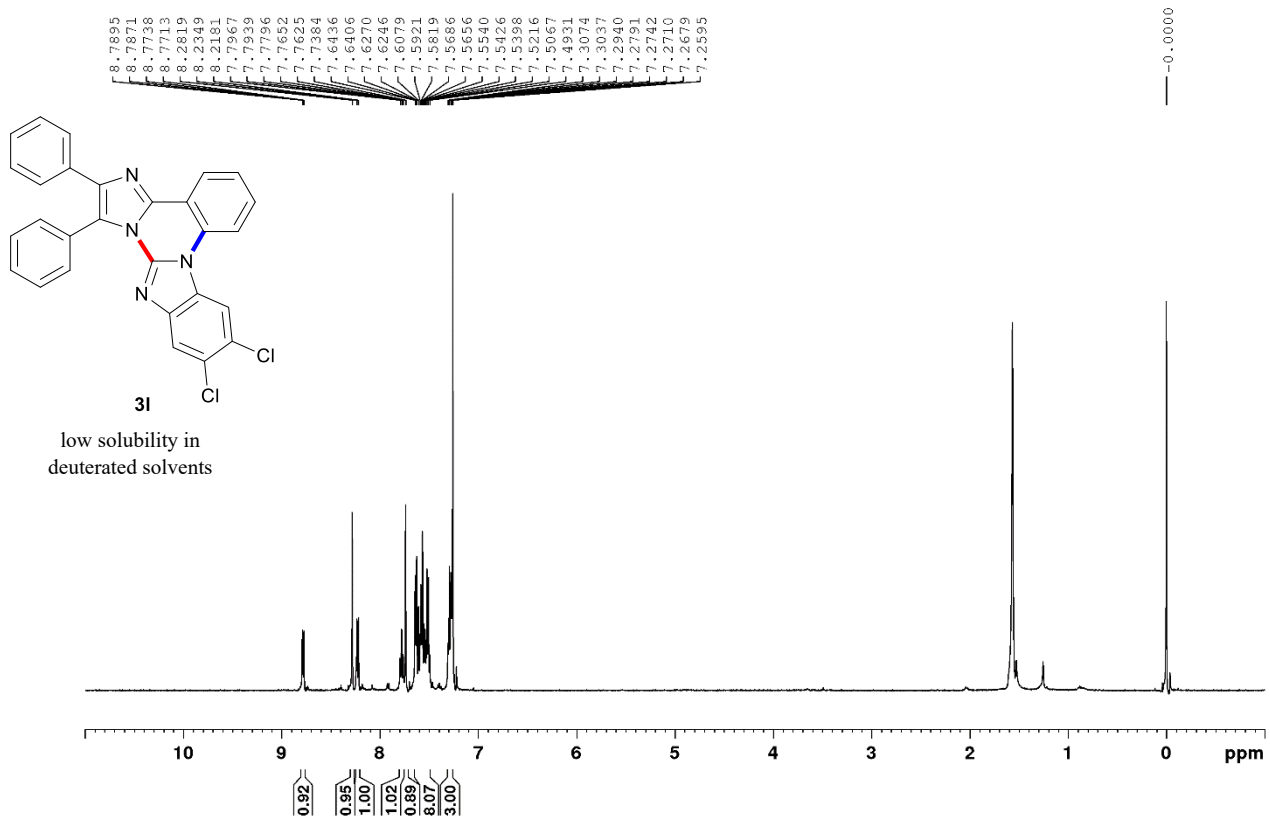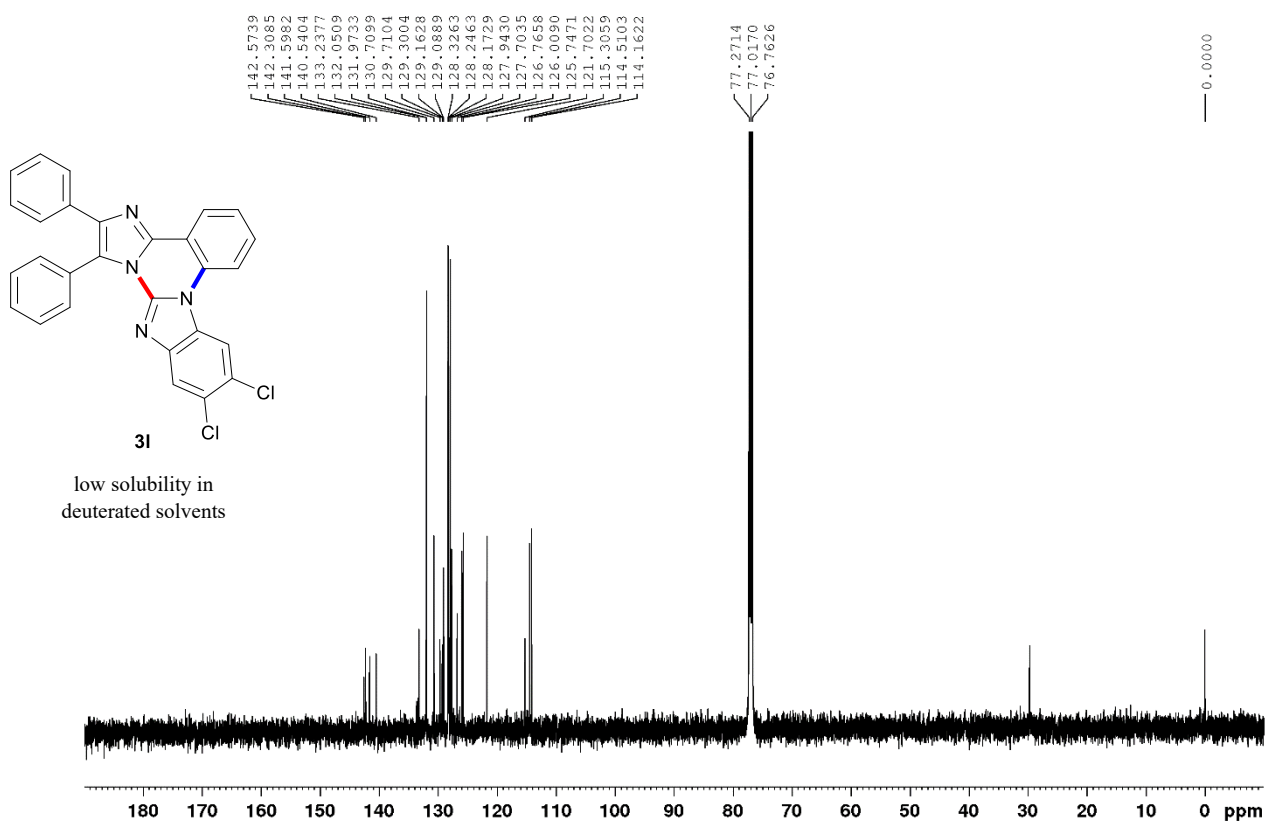



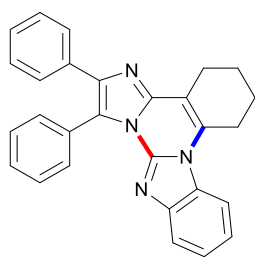

**3m**

low solubility in deuterated solvents

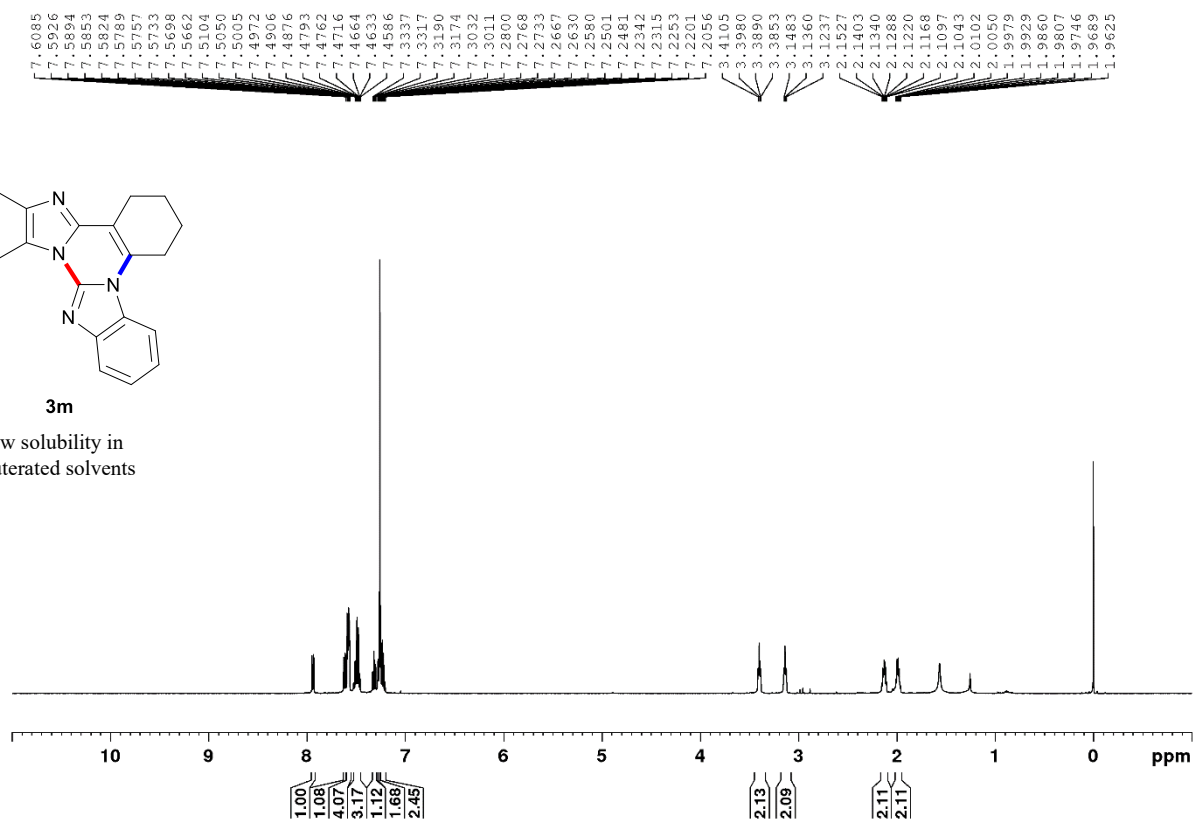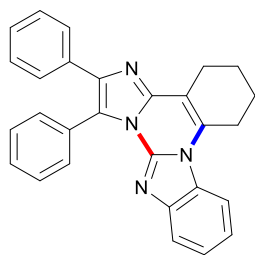

**3m**

low solubility in deuterated solvents

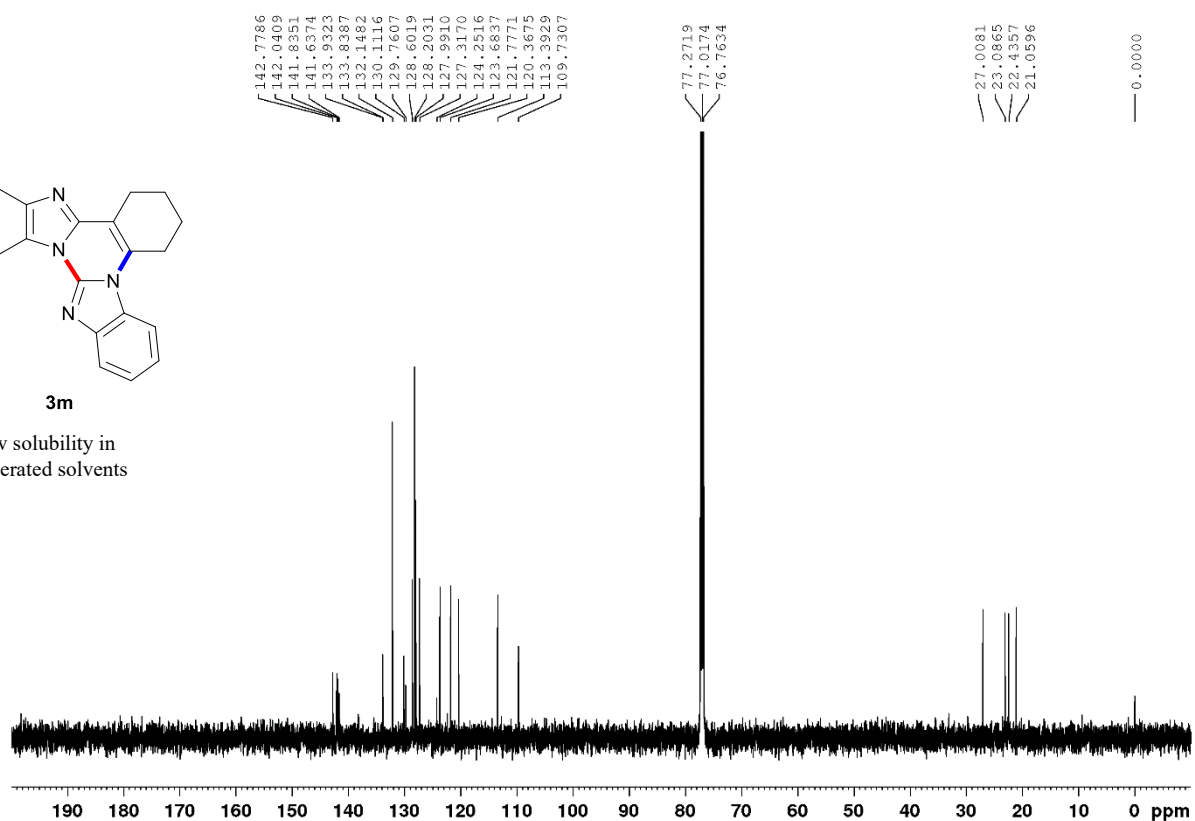

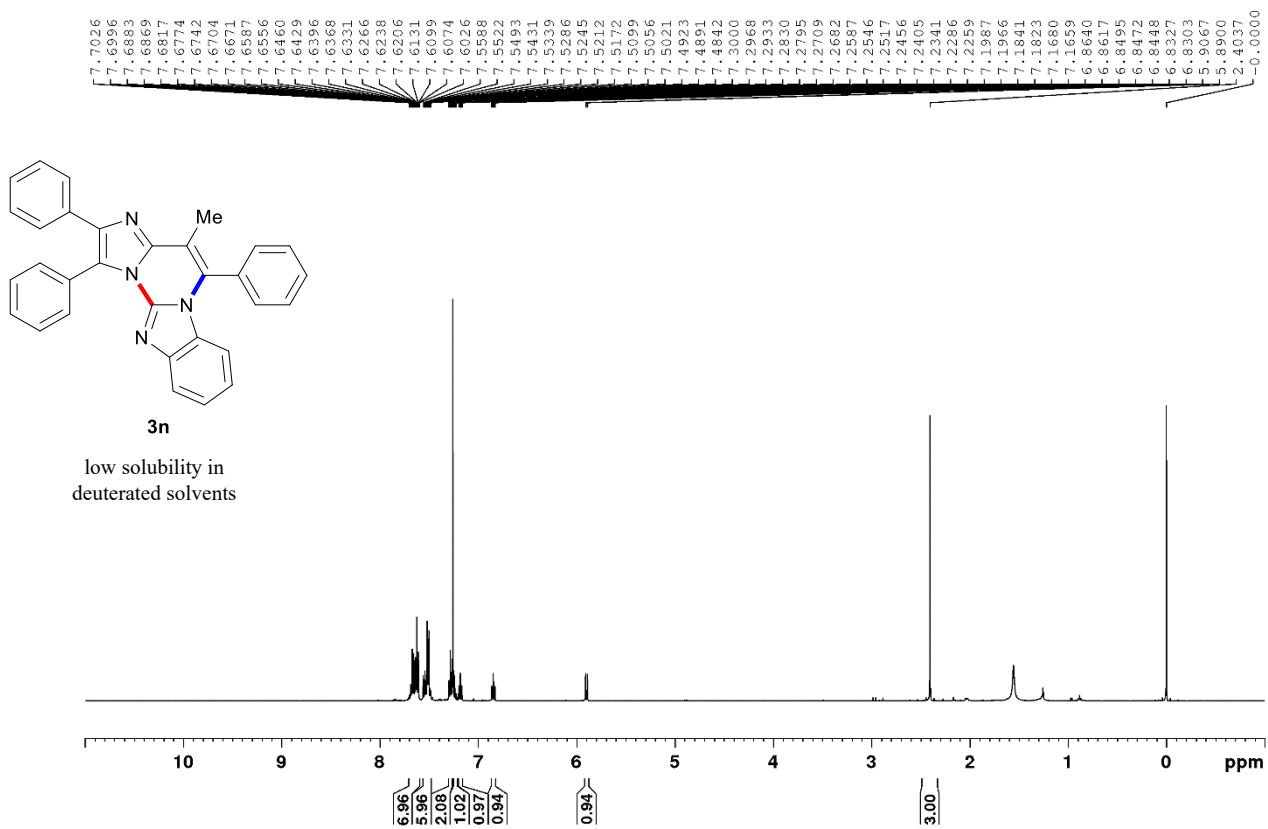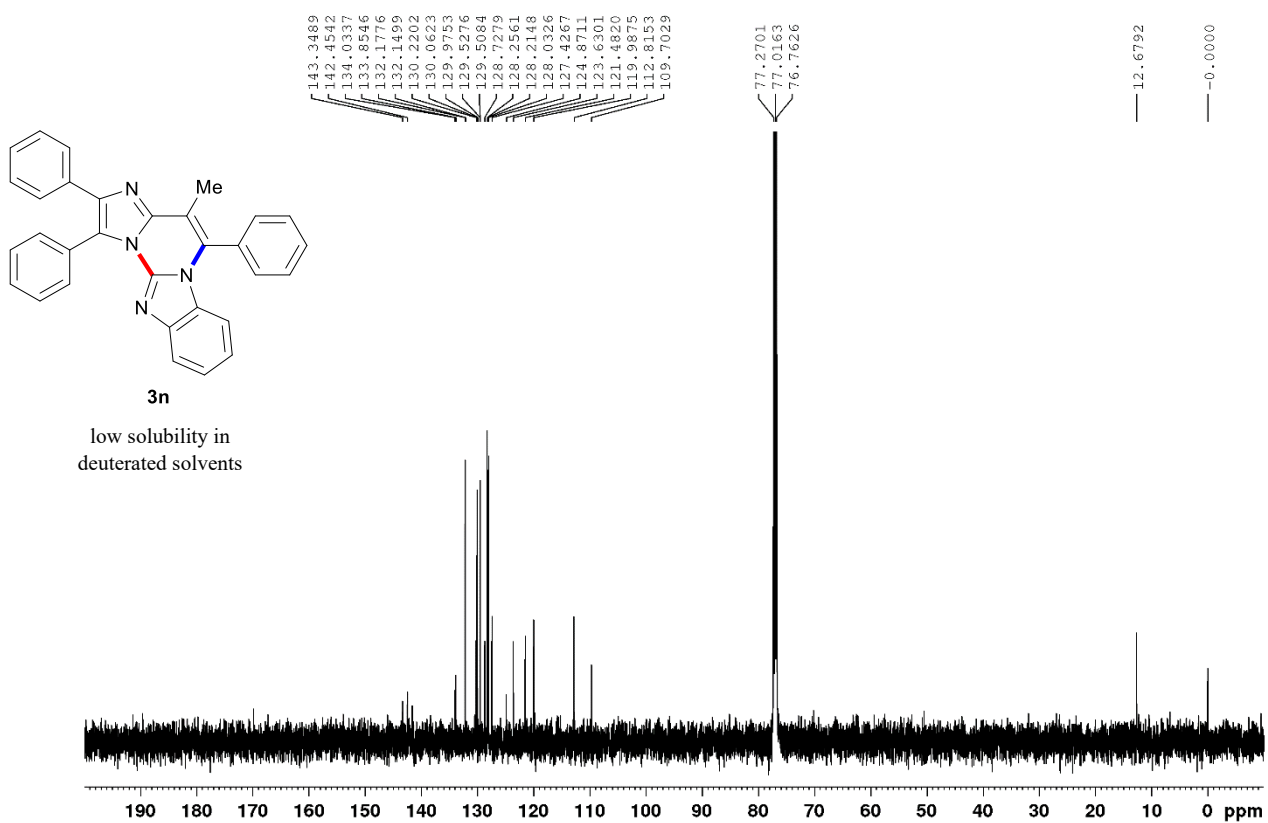

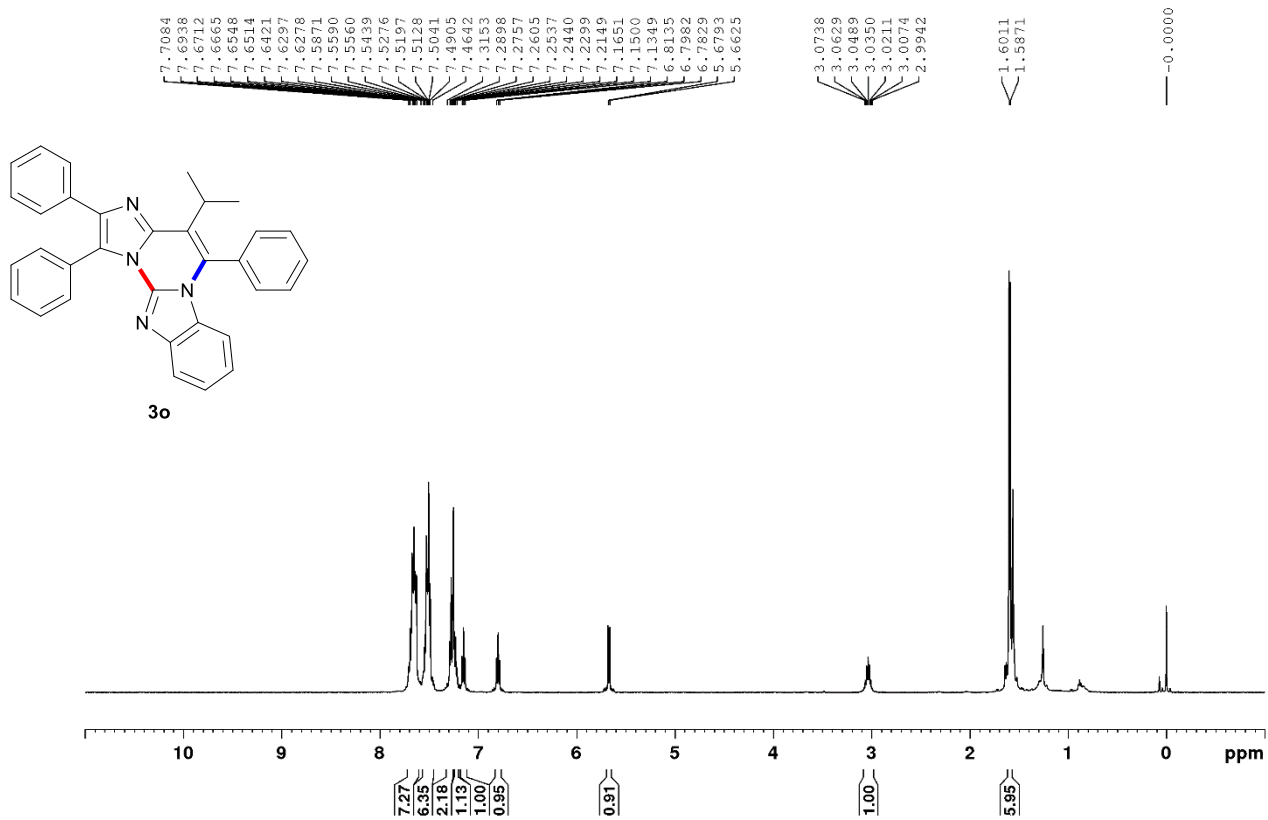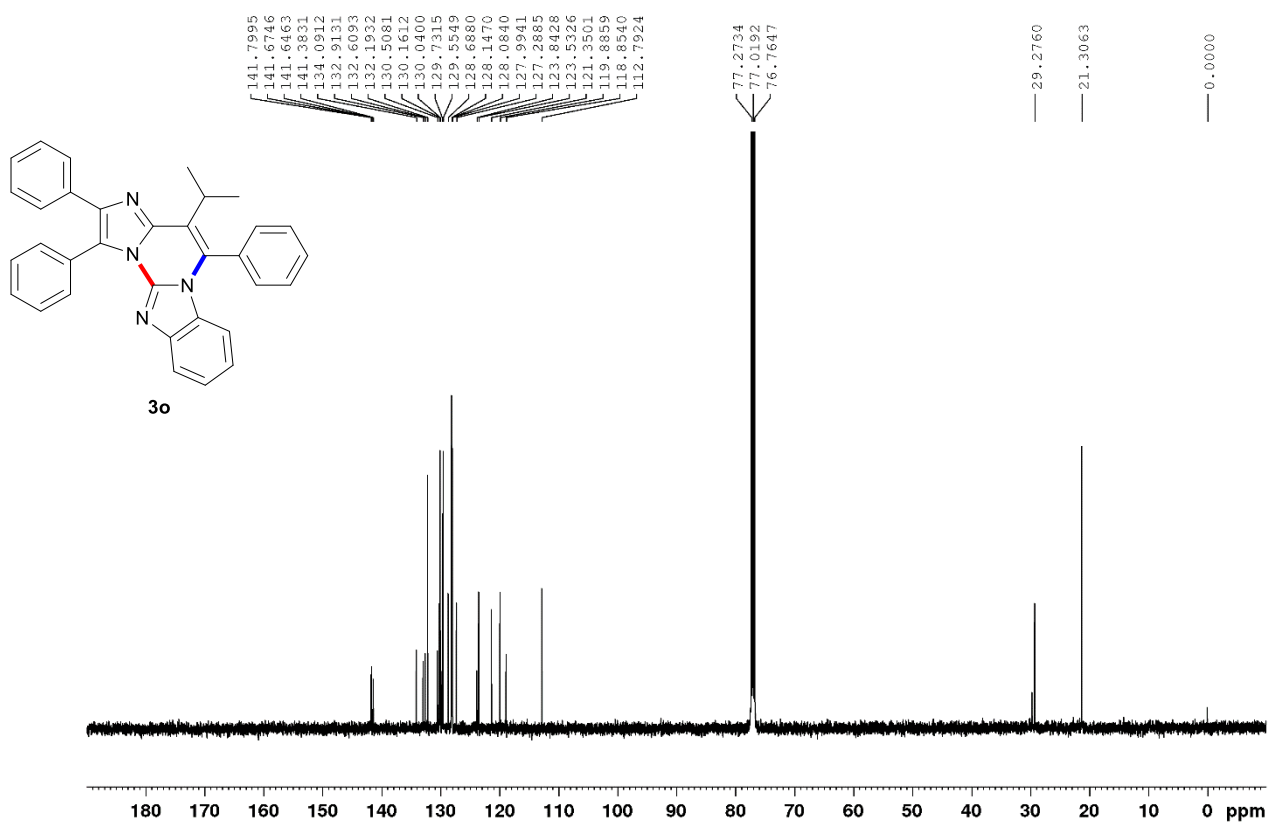

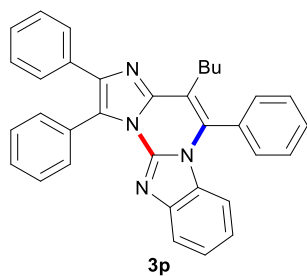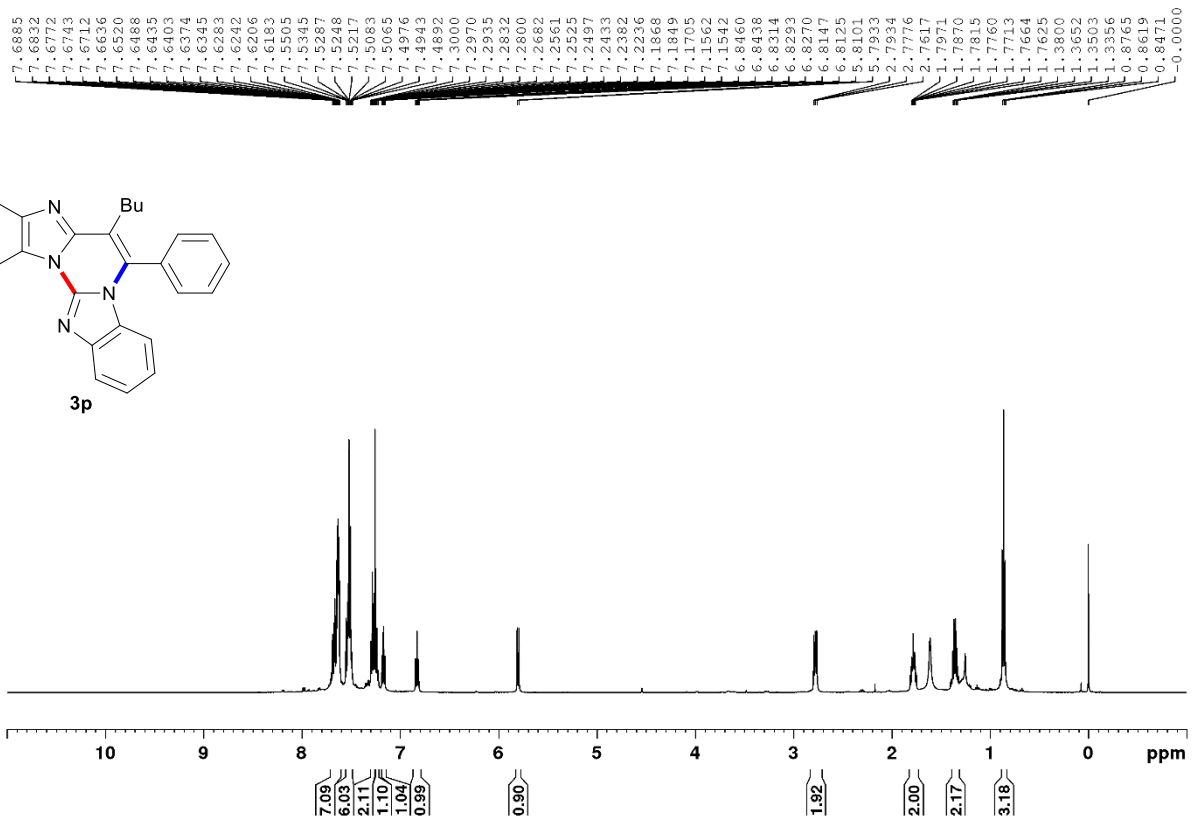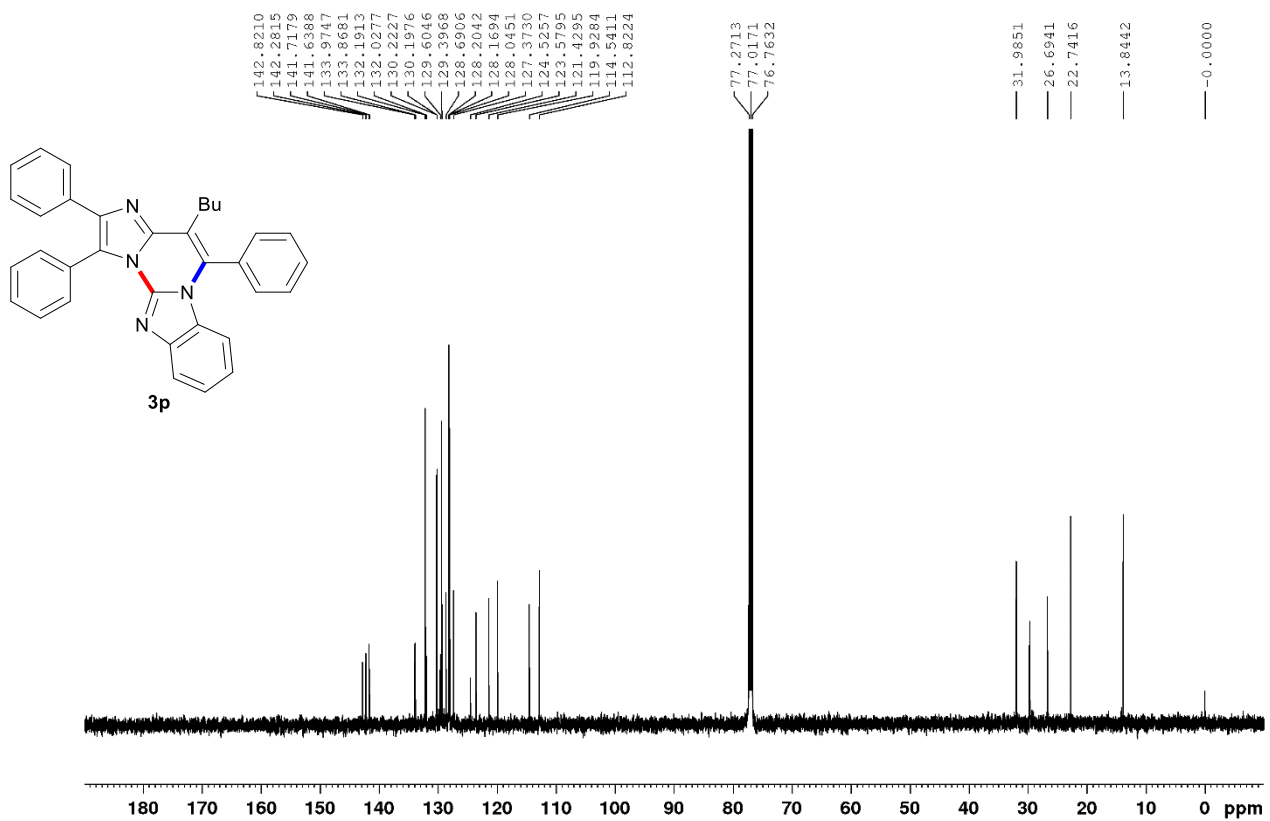

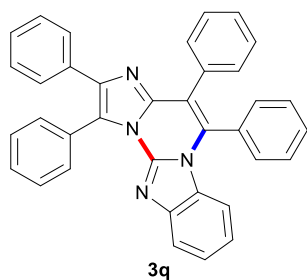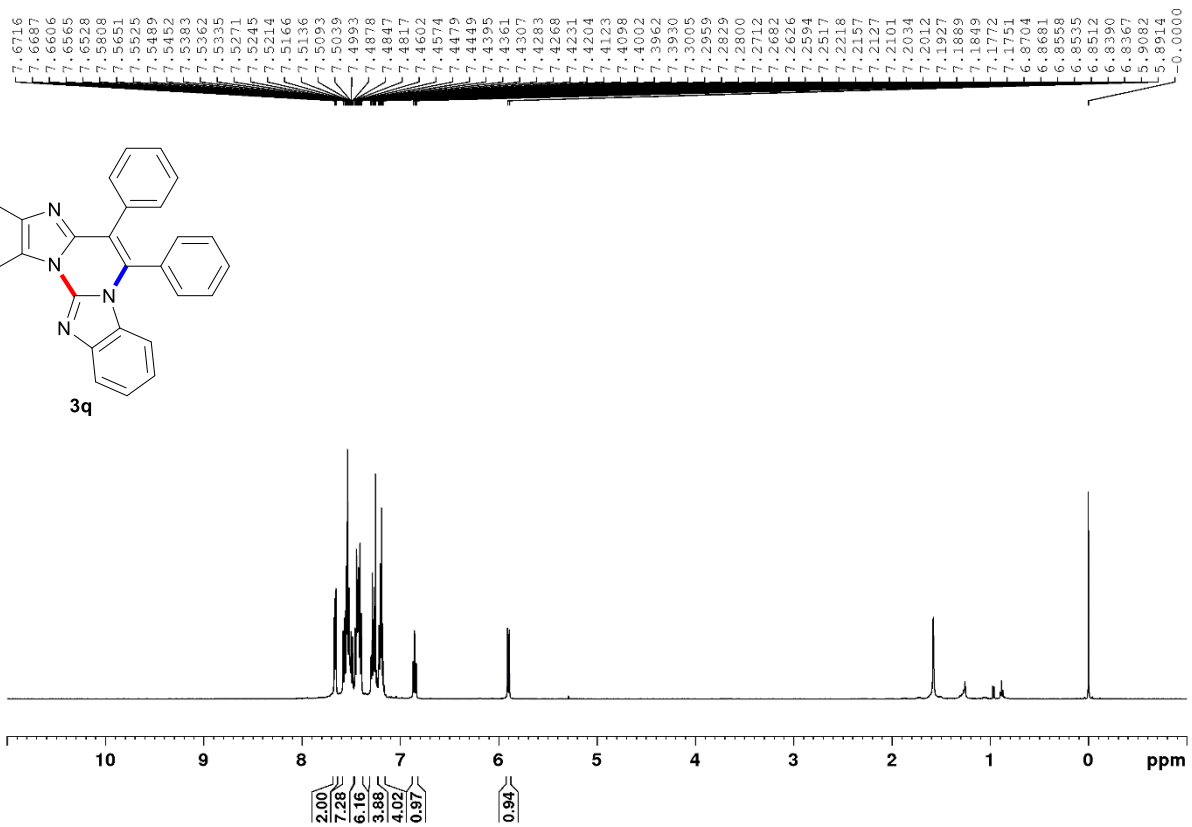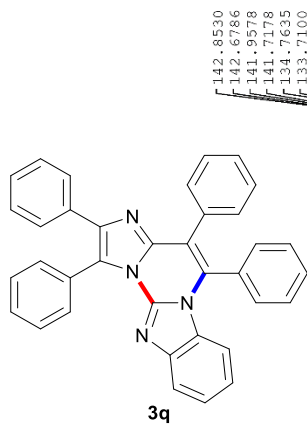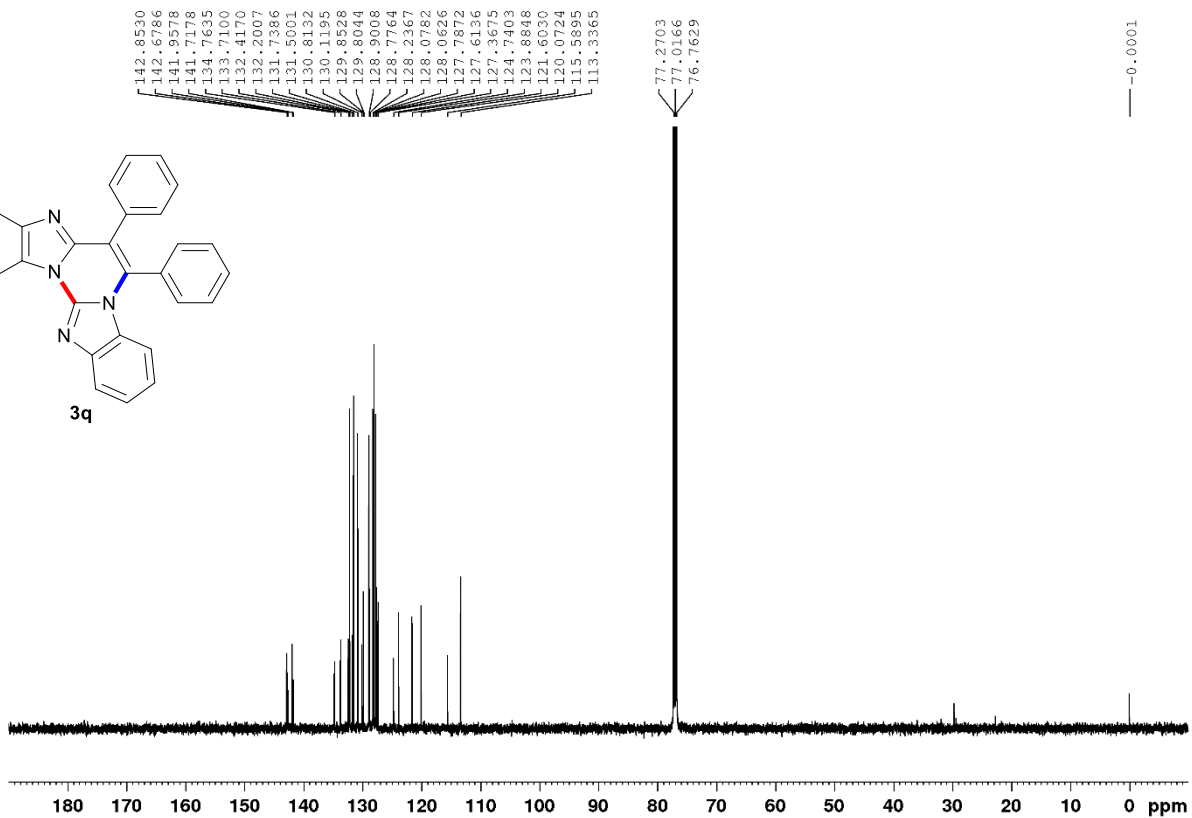

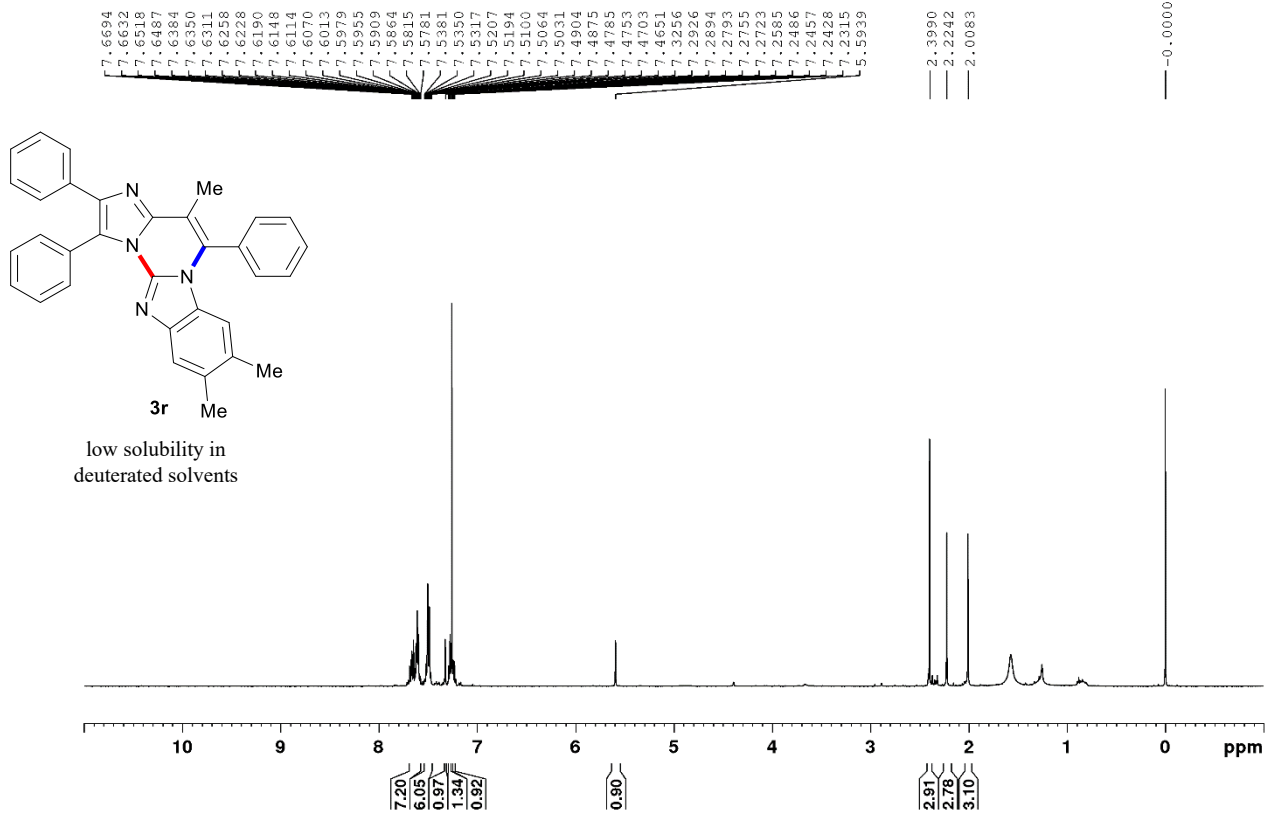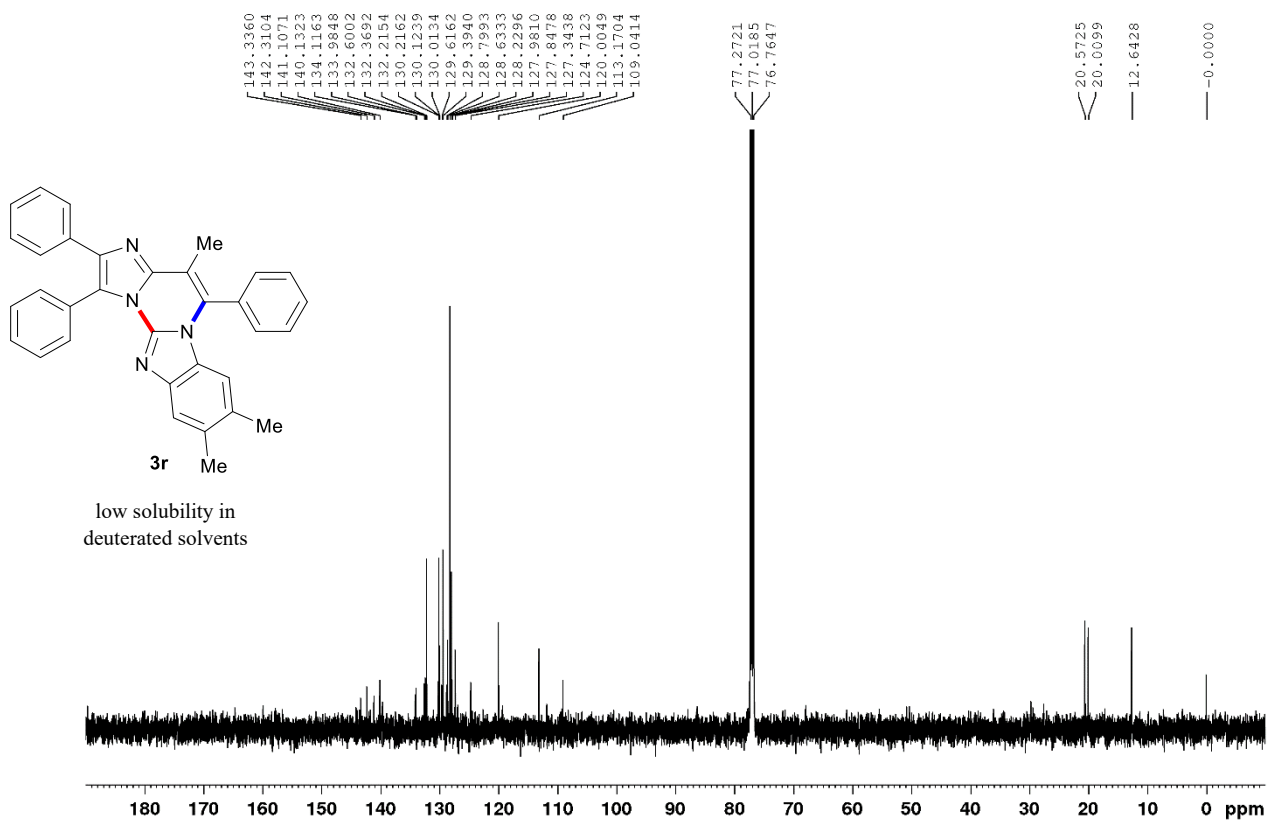

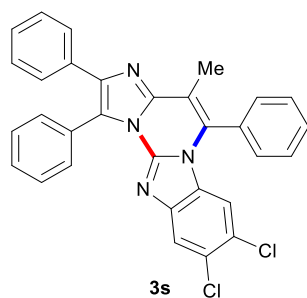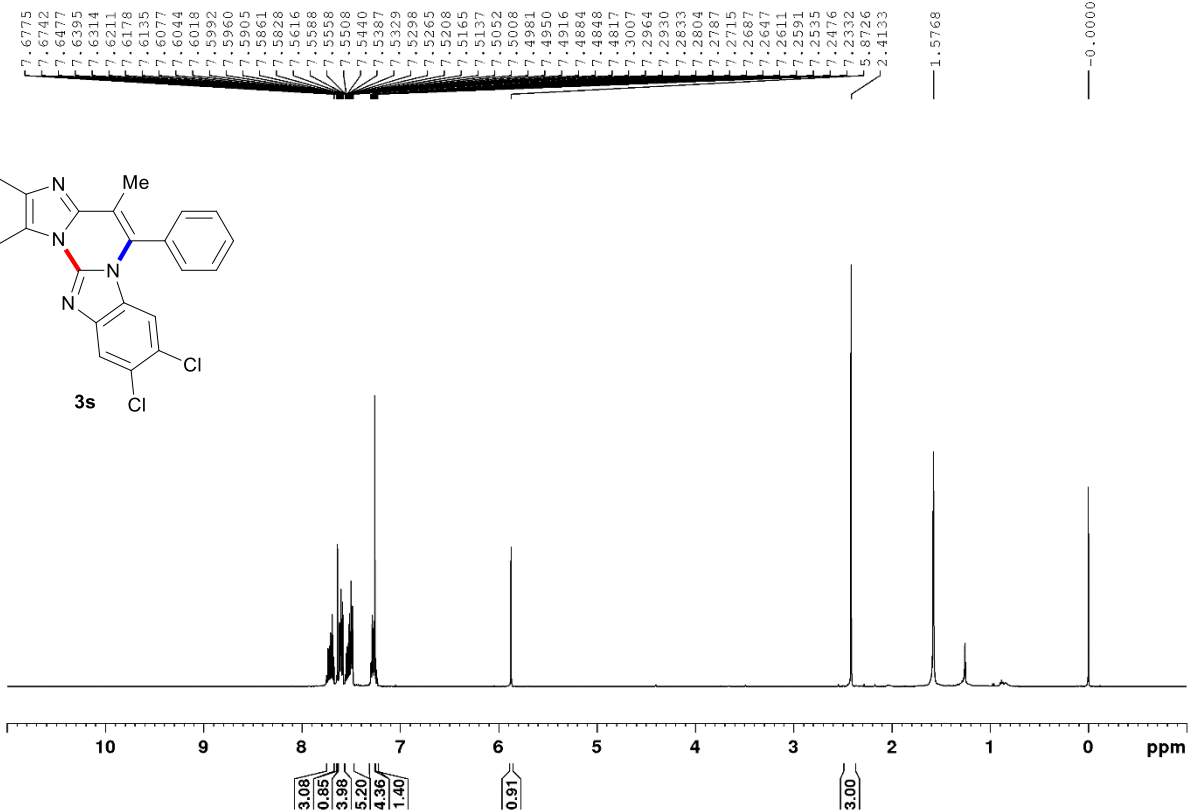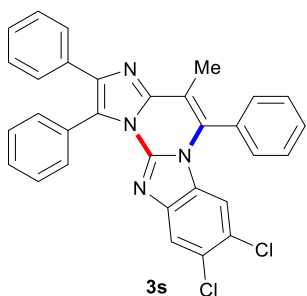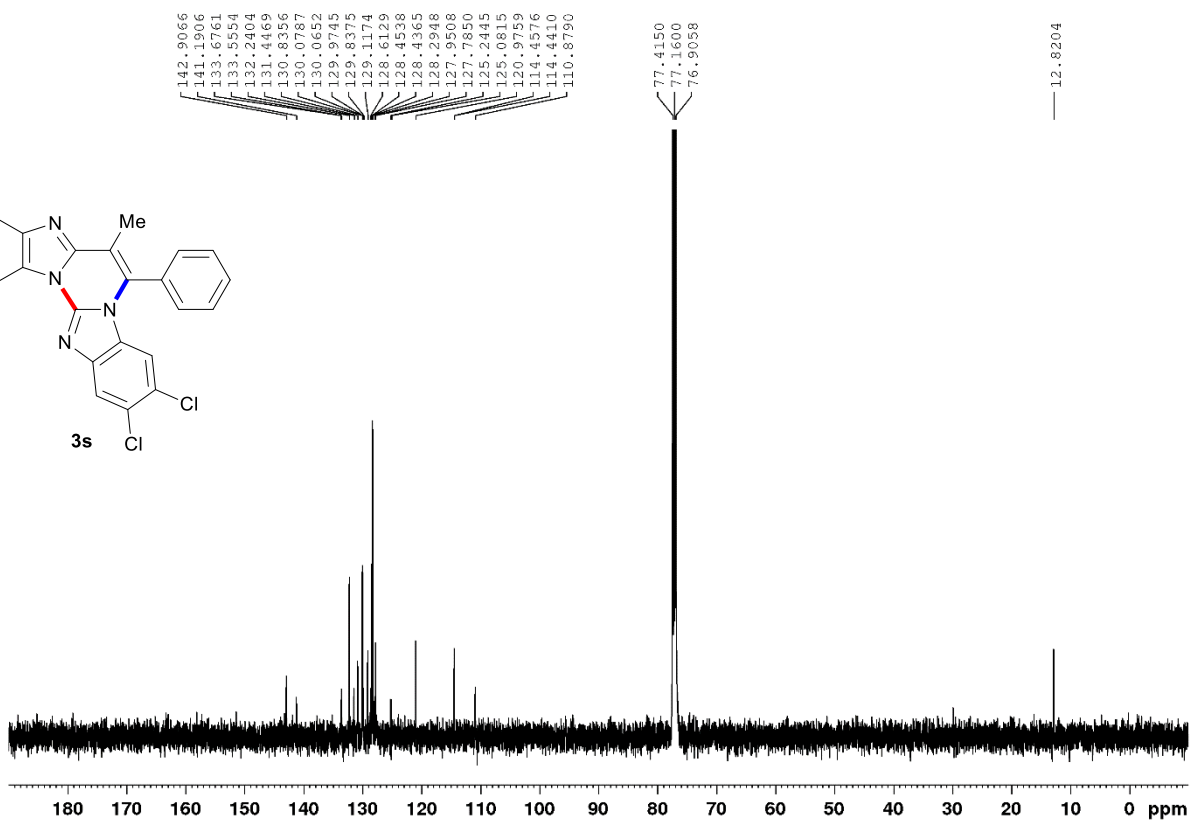

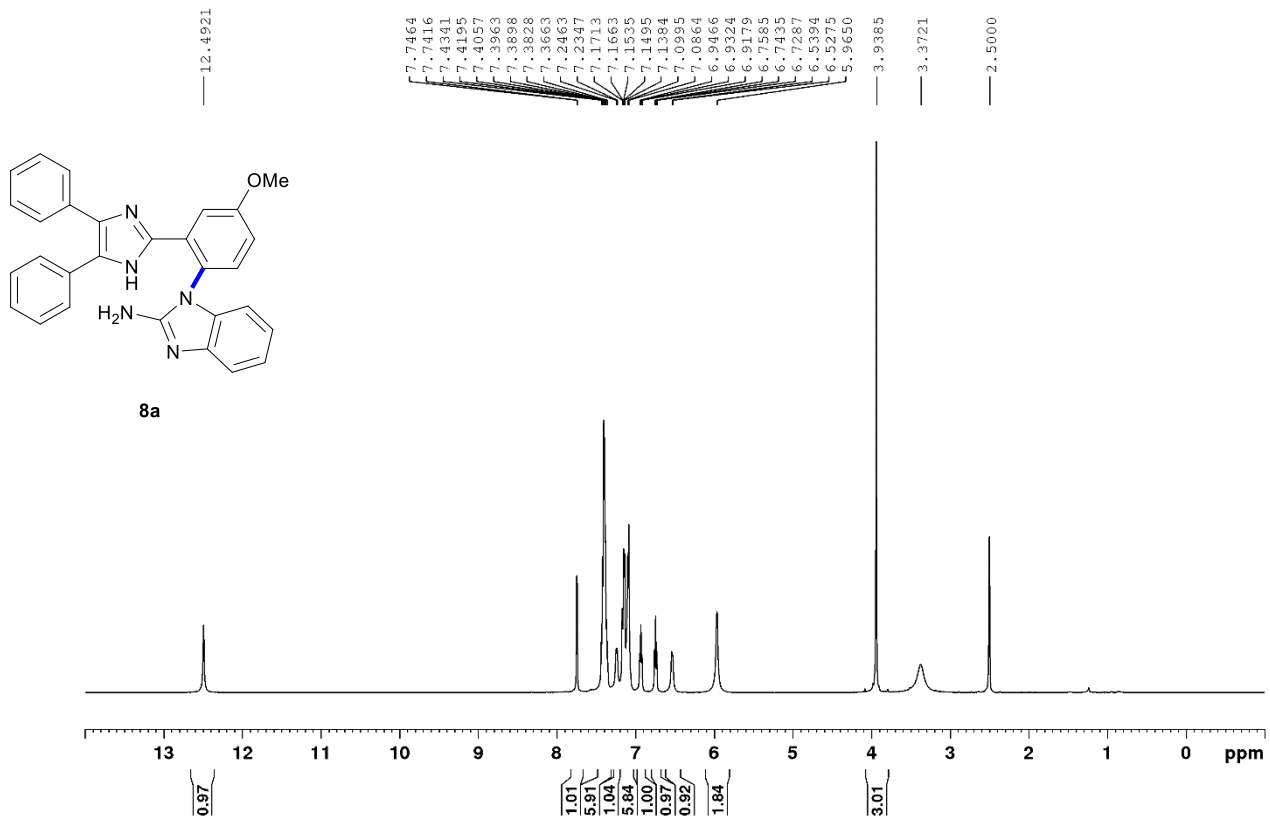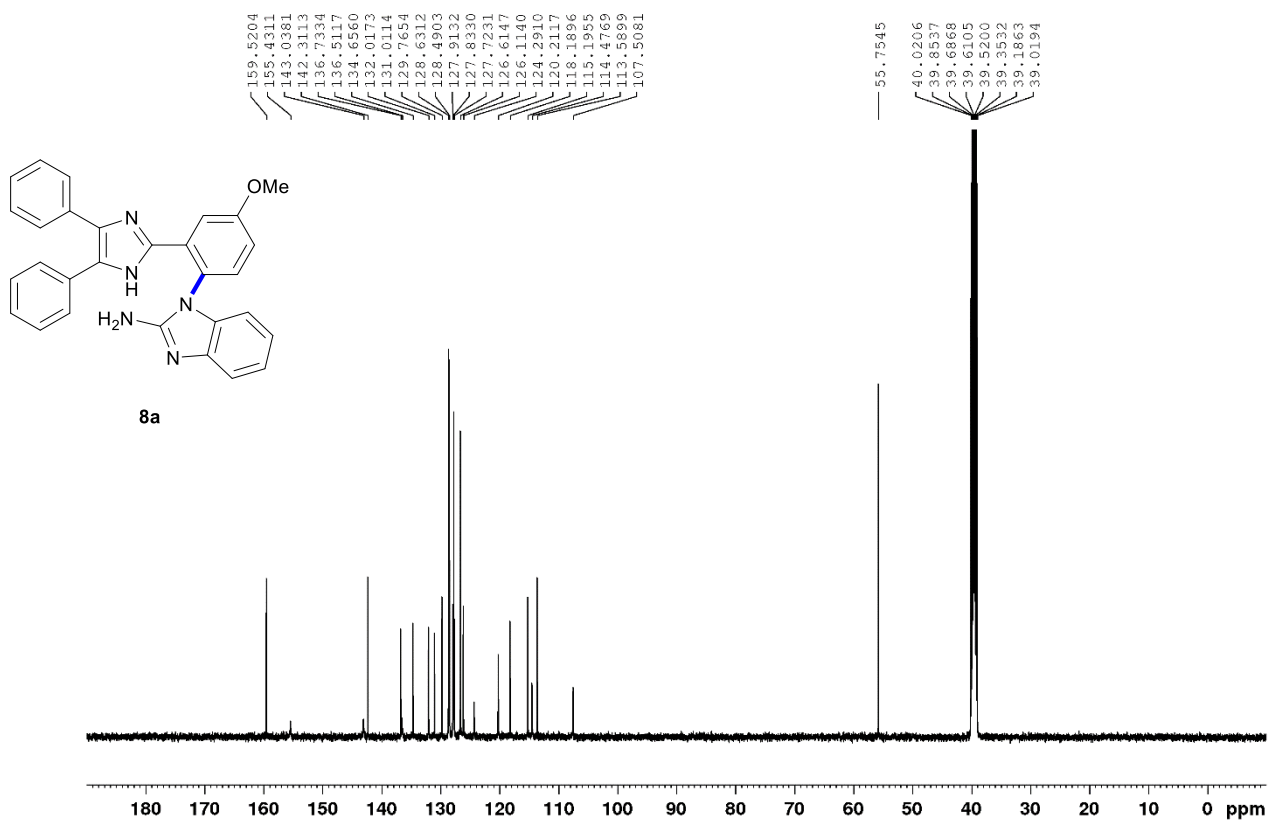

Supplement: d1ra04396j1.pdf [file d1ra04396j1.pdf]
